# Supplementary material for: Mechanisms underlying genome instability mediated by formation of foldback inversions in Saccharomyces cerevisiae
Source: eLife. 2020 Aug 7;9:e58223. doi: 10.7554/eLife.58223 (PMC7467729; doi:10.7554/eLife.58223)
Supplement: Figure 5—source data 1. [file elife-58223-fig5-data1.xlsx]

## Sheet: Sheet1
Figure 5 - source data 1. Properties of the ssDNA hairpins from observed foldback inversions.
Category	Subtable	Genotype	Assay	Sample	Sample Hairpin No.	Hairpin	nt loop	bp stem	nGC stem	mismatches stem	nt unpaired stem	reference
WT-MRE11-SAE2	na	WT	uGCR	bzg001	1	35846_35882	12	12	4	1	0	PMID:29505562
WT-MRE11-SAE2	na	WT	uGCR	PGSP3178	1	40078_40116	9	13	4	2	0	PMID:24699249
WT-MRE11-SAE2	na	WT	uGCR-sys	ASYG281	1	in can1::NAT	36	5	5	0	0	PMID:30206225
WT-MRE11-SAE2	na	WT	uGCR-sys	ASYG287	1	in can1::NAT	135	4	4	0	0	PMID:30206225
WT-MRE11-SAE2	na	WT	uGCR-sys	ASYG288	1	in can1::NAT	22	9	7	1	0	PMID:30206225
WT-MRE11-SAE2	na	asf1	classic	asf1-m5	1	40196_40543	342	5	3	1	0	PMID:16055731
WT-MRE11-SAE2	na	mec3 tel1	classic	mec3tel1-m7	1	33843_46190	12337	5	2	0	1	PMID:16055731
WT-MRE11-SAE2	na	rdh54 tlc1	classic	rdh54tlc1-m1	1	35447_37677	2231	22	8	3	0	PMID:16055731
WT-MRE11-SAE2	na	tel1 lig4 tlc1	classic	tel1lig4tlc1-m29	1	41046_72379	31333	8	4	0	0	PMID:16055731
WT-MRE11-SAE2	na	tel1 lig4 tlc1	classic	tel1lig4tlc1-m32	1	35462_37662	2201	10	3	1	0	PMID:16055731
WT-MRE11-SAE2	na	xrs2	classic	xrs2-m4	1	33843_46190	12348	5	2	0	1	PMID:16055731
WT-MRE11-SAE2	na	mec1 sml1 lig4 tlc1	classic	mec1sml1lig4tlc1-m21	1	41101_42522	1404	8	4	1	0	PMID:16055731
WT-MRE11-SAE2	na	mec1 sml1 lig4 tlc1	classic	mec1sml1lig4tlc1-m24	1	41326_47827	6453	14	6	0	0	PMID:16055731
WT-MRE11-SAE2	na	mec1 sml1 lig4 tlc1	classic	mec1sml1lig4tlc1-m26	1	40594_47981	7366	11	7	2	0	PMID:16055731
WT-MRE11-SAE2	na	mec1 sml1 lig4 tlc1	classic	mec1sml1lig4tlc1-m31	1	32455_42072	9582	15	6	3	0	PMID:16055731
WT-MRE11-SAE2	na	mec1 sml1 lig4 tlc1	classic	mec1sml1lig4tlc1-m34	1	33220_89382	56141	12	6	0	0	PMID:16055731
WT-MRE11-SAE2	na	rad55	classic	rad55-m1	1	38118_54725	16571	17	7	1	0	PMID:16055731
WT-MRE11-SAE2	na	rfc5-1 yku70	classic	rfc51yku70-m4	1	42703_68200	25435	19	8	1	0	PMID:16055731
WT-MRE11-SAE2	na	rfc5-1 yku70	classic	rfc51yku70-m8	1	32932_33862	928	6	4	0	0	PMID:16055731
WT-MRE11-SAE2	na	tlc1 type II survivor	classic	tlc1-m5	1	32997_36560	3529	15	4	2	0	PMID:16055731
WT-MRE11-SAE2	na	mec1 sml1 lig4	classic	mec1sml1lig4-m9	1	35447_37677	2183	23	8	3	0	PMID:16055731
WT-MRE11-SAE2	na	rad59 tlc1	classic	rad59tlc1-m2	1	40356_40714	359	6	1	0	0	PMID:16055731
WT-MRE11-SAE2	na	rfc5-1 tlc1	classic	rfc51tlc1-m3	1	38118_54759	16564	21	8	1	1	PMID:16055731
WT-MRE11-SAE2	na	top3	classic	top3-m9	1	34291_100384	66094	6	3	0	1	PMID:16055731
WT-MRE11-SAE2	na	tel1	uGCR	PGSP217	1	40117_40155	25	7	2	0	0	PMID:24699249
WT-MRE11-SAE2	na	tel1	uGCR	PGSP218	1	25817-30_25820	10	10	5	2	0	PMID:24699249
WT-MRE11-SAE2	na	tel1	uGCR	PGSP362	1	25817-30_25820	10	10	5	2	0	PMID:24699249
WT-MRE11-SAE2	na	tel1	uGCR	PGSP364	1	25817-30_25820	10	10	5	2	0	PMID:24699249
WT-MRE11-SAE2	na	tel1	uGCR	PGSP366	1	25817-30_25820	10	10	5	2	0	PMID:24699249
WT-MRE11-SAE2	na	tel1	uGCR	PGSP365	1	42134_42153	4	6	4	2	0	PMID:24699249
WT-MRE11-SAE2	na	tel1	uGCR	PGSP2977	1	34339-950_34339-894	39	8	7	1	0	PMID:24699249
WT-MRE11-SAE2	na	tel1	uGCR	PGSP3124	1	25817-2402_24817-2349	44	5	2	0	0	PMID:24699249
WT-MRE11-SAE2	na	tel1	uGCR	PGSP3121	1	34339-980_34339-938	35	4	1	0	0	PMID:24699249
WT-MRE11-SAE2	na	tel1	uGCR	PGSP3125	1	34339-980_34339-938	35	4	1	0	0	PMID:24699249
WT-MRE11-SAE2	na	cdc73	sGCR	isolate 303	1	in can1::NAT	175	5	5	0	0	PMID:29320491
WT-MRE11-SAE2	na	tel1 cdc73	sGCR	isolate 321	1	25817-1670_25817-1624	35	6	3	0	0	PMID:29320491
WT-MRE11-SAE2	na	tel1 cdc73	sGCR	isolate 322	1	40308_44722	4407	6	4	0	0	PMID:29320491
WT-MRE11-SAE2	na	tel1 cdc73	sGCR	isolate 327	1	in can1::NAT	142	5	5	0	0	PMID:29320491
WT-MRE11-SAE2	na	yku80 cdc73	sGCR	isolate 349	1	in can1::NAT	259	8	6	0	0	PMID:29320491
WT-MRE11-SAE2	na	mrc1	uGCR-sys	ASYG295	1	34471_35063	269	12	2	1	0	PMID:30206225
WT-MRE11-SAE2	na	mrc1	uGCR-sys	ASYG296	1	40281_40327	26	11	1	0	1	PMID:30206225
WT-MRE11-SAE2	na	mrc1	uGCR-sys	ASYG300	1	in can1::NAT	70	3	3	0	0	PMID:30206225
WT-MRE11-SAE2	na	mrc1	uGCR-sys	ASYG301	1	42103_42151	41	4	3	0	0	PMID:30206225
WT-MRE11-SAE2	na	mrc1	uGCR-sys	ASYG302	1	29151_29197	31	7	3	1	0	PMID:30206225
WT-MRE11-SAE2	na	mrc1	uGCR-sys	ASYG307	1	42756_42792	13	8	5	4	0	PMID:30206225
WT-MRE11-SAE2	na	mrc1	uGCR-sys	ASYG477	1	35846_35882	12	13	4	0	1	PMID:30206225
WT-MRE11-SAE2	na	mrc1	uGCR-sys	ASYG478	1	40078_40116	9	15	4	2	0	PMID:30206225
WT-MRE11-SAE2	na	mrc1	uGCR-sys	ASYG479	1	41672_43525	1823	16	10	1	1	PMID:30206225
WT-MRE11-SAE2	na	mrc1	uGCR-sys	ASYG480	1	26913_27048	111	13	6	0	1	PMID:30206225
WT-MRE11-SAE2	na	mrc1	uGCR-sys	ASYG482	1	in can1::NAT	163	23	16	4	2	PMID:30206225
WT-MRE11-SAE2	na	mrc1	uGCR-sys	ASYG483	1	in can1::NAT	61	4	4	0	0	PMID:30206225
WT-MRE11-SAE2	na	mrc1-C14 swr1	sGCR	ASYG200	1	in can1::NAT	243	6	5	0	0	PMID:30206225
WT-MRE11-SAE2	na	mrc1-C14 swr1	sGCR	ASYG201	1	in can1::NAT	157	5	5	0	0	PMID:30206225
WT-MRE11-SAE2	na	mrc1-C14 swr1	sGCR	ASYG203	1	35312_35346	25	5	1	0	0	PMID:30206225
WT-MRE11-SAE2	na	mrc1-C14 swr1	sGCR	ASYG204	1	in can1::NAT	39	7	4	0	0	PMID:30206225
WT-MRE11-SAE2	na	mrc1-C14 swr1	sGCR	ASYG209	1	27721_27776	45	9	4	1	0	PMID:30206225
WT-MRE11-SAE2	na	mrc1-C14 swr1	sGCR	ASYG210	1	40117_40155	25	7	2	0	0	PMID:30206225
WT-MRE11-SAE2	na	mrc1 swr1	sGCR	ASYG230	1	29503_29539	27	5	1	0	0	PMID:30206225
WT-MRE11-SAE2	na	mrc1 swr1	uGCR-sys	ASYG325	1	39120_39170	21	15	5	3	0	PMID:30206225
WT-MRE11-SAE2	na	mrc1 swr1	uGCR-sys	ASYG328	1	35846_35882	12	12	4	0	1	PMID:30206225
WT-MRE11-SAE2	na	swr1	sGCR	ASYG176	1	can1:NAT to 40,999	7437	10	9	2	0	PMID:30206225
WT-MRE11-SAE2	na	swr1	uGCR-sys	ASYG308	1	in can1::NAT	36	5	5	0	0	PMID:30206225
WT-MRE11-SAE2	na	swr1	uGCR-sys	ASYG310	1	35846_35882	12	12	4	0	1	PMID:30206225
WT-MRE11-SAE2	na	swr1	uGCR-sys	ASYG316	1	40117_40155	25	7	2	0	0	PMID:30206225
WT-MRE11-SAE2	na	swr1	uGCR-sys	ASYG317	1	in can1::NAT	254	9	7	1	0	PMID:30206225
WT-MRE11-SAE2	na	swr1	uGCR-sys	ASYG485	1	in can1::NAT	130	5	4	0	0	PMID:30206225
WT-MRE11-SAE2	na	swr1	uGCR-sys	ASYG490	1	in can1::NAT	298	6	5	1	0	PMID:30206225
mre11	na	mre11	uGCR	bzg004	1	42453_42554	63	8	4	0	0	PMID:29505562
mre11	na	mre11	uGCR	bzg005	1	34339-107_34339-75	3	15	9	0	0	PMID:29505562
mre11	na	mre11	uGCR	bzg006	1	34339-860_34339-825	12	10	8	2	0	PMID:29505562
mre11	na	mre11	uGCR	bzg007	1	34339-901_34339-868	14	9	7	1	0	PMID:29505562
mre11	na	mre11 mms21-CH	uGCR	bzg013	1	42277_42290	4	5	5	0	0	PMID:29505562
mre11	na	mre11 mms21-CH	uGCR	bzg014	1	27344_27365	4	7	7	2	0	PMID:29505562
mre11	na	mre11 mms21-CH	uGCR	bzg015	1	25817-29_25819	10	9	4	2	0	PMID:29505562
mre11	na	mre11 mms21-CH	uGCR	bzg016	1	34339-1219_34339-1204	6	5	5	1	0	PMID:29505562
mre11	na	mre11 mms21-CH	uGCR	bzg017	1	30857_30872	4	6	3	0	0	PMID:29505562
mre11	na	mre11 mms21-CH	uGCR	bzg018	1	34339-107_34339-75	3	15	9	0	0	PMID:29505562
mre11	na	mre11 mms21-CH	uGCR	bzg019	1	34339-107_34339-75	3	15	9	0	0	PMID:29505562
mre11	na	mre11 mms21-CH	uGCR	bzg020	1	29899_29913	3	6	3	0	0	PMID:29505562
mre11	na	mre11 mms21-CH	uGCR	bzg021	1	26457_26474	6	6	4	0	0	PMID:29505562
mre11	na	mre11 mms21-CH	uGCR	bzg022	1	28829_28849	9	6	2	0	0	PMID:29505562
mre11	na	mre11-H125N mms21-CH	uGCR	bzg033	1	34339-107_34339-75	3	15	9	0	0	PMID:29505562
mre11	na	mre11-H125N mms21-CH	uGCR	bzg034	1	27074_27102	5	10	7	2	0	PMID:29505562
mre11	na	mre11-H125N mms21-CH	uGCR	bzg035	1	25817-2208_25817-2200	6	2	2	0	0	PMID:29505562
mre11	na	mre11-H125N mms21-Ch	uGCR	bzg040	1	29513_29529	5	6	2	0	0	PMID:29505562
mre11	na	mre11-H125N mms21-CH	uGCR	bzg041	1	34339-107_34339-75	3	15	9	0	0	PMID:29505562
mre11	na	mre11-H125N	uGCR	bzg042	1	34339-51_34339-45	4	2	1	0	0	PMID:29505562
mre11	na	mre11-H125N	uGCR	bzg043	1	34339-107_34339-75	3	15	9	0	0	PMID:29505562
mre11	na	mre11-H125N	uGCR	bzg044	1	34339-107_34339-75	3	15	9	0	0	PMID:29505562
mre11	na	mre11-H125N	uGCR	bzg045	1	34339-107_34339-75	3	15	9	0	0	PMID:29505562
mre11	na	mre11-H125N	uGCR	bzg046	1	34339-107_34339-75	3	15	9	0	0	PMID:29505562
mre11	na	mre11-H125N	uGCR	bzg047	1	26457_26474	6	6	4	0	0	PMID:29505562
WT-MRE11-SAE2	AF	exo1 yku80	uGCR	PGSP5063	1	34339-953_34339-883	59	6	4	0	0	This study
WT-MRE11-SAE2	AF	exo1 yku80	uGCR	PGSP5066	1	34339-107_34339-75	3	15	9	0	0	This study
WT-MRE11-SAE2	AF	exo1 yku80	uGCR	PGSP5067	1	34339-502_34339-459	34	5	3	0	0	This study
WT-MRE11-SAE2	AF	exo1 yku80	uGCR	PGSP5069	1	34339-107_34339-75	3	15	9	0	0	This study
WT-MRE11-SAE2	AF	exo1 yku80	uGCR	PGSP5070	1	35664_35725	48	7	1	0	0	This study
WT-MRE11-SAE2	P	rrm3	uGCR	PGSP421 [bzg097]	1	25965_26002	22	8	3	0	0	This study
WT-MRE11-SAE2	P	rrm3	uGCR	PGSP426 [bzg102]	1	25817-2487_39967	16000	11	6	0	1	This study
WT-MRE11-SAE2	P	rrm3	uGCR	PGSP4570 [bzg105]	1	41622_41681	44	7	3	1	0	This study
WT-MRE11-SAE2	P	rrm3	uGCR	PGSP4571 [bzg106]	1	40281_40326	24	11	2	1	0	This study
WT-MRE11-SAE2	T	rad10	uGCR	PGSP4580 [bzg132]	1	35447_37677	2178	22	10	4	0	This study
WT-MRE11-SAE2	AA	yen1	uGCR	PGSP4892	1	29503_29539	27	5	1	0	0	This study
WT-MRE11-SAE2	AA	yen1	uGCR	PGSP4897	1	34759_36909	2129	11	3	0	0	This study
WT-MRE11-SAE2	AA	yen1	uGCR	PGSP4899	1	40994_43019	2013	7	4	0	0	This study
WT-MRE11-SAE2	AE	yku80	uGCR	PGSP3609	1	35889_35902	4	5	3	0	0	This study
WT-MRE11-SAE2	AE	yku80	uGCR	PGSP3610	1	34339-107_34339-75	3	15	9	0	0	This study
WT-MRE11-SAE2	AE	yku80	uGCR	PGSP3611	1	34339-871_34339-814	48	5	4	0	0	This study
WT-MRE11-SAE2	AE	yku80	uGCR	PGSP3615	1	34339-107_34339-75	3	15	9	0	0	This study
WT-MRE11-SAE2	AE	yku80	uGCR	PGSP3617	1	34339-107_34339-75	3	15	9	0	0	This study
WT-MRE11-SAE2	AJ	sgs1	uGCR	PGSP944	1	35694_35777	60	10	5	2	0	This study
WT-MRE11-SAE2	AM	sgs1 yku80	uGCR	PGSP4691	1	40968_40983	4	6	2	0	0	This study
WT-MRE11-SAE2	AM	sgs1 yku80	uGCR	PGSP4692	1	35685_35968	4	5	2	0	0	This study
WT-MRE11-SAE2	AM	sgs1 yku80	uGCR	PGSP4698	1	34339-1219_34339-501	702	7	6	1	0	This study
WT-MRE11-SAE2	AM	sgs1 yku80	uGCR	PGSP4699	1	35581_35596	4	6	2	0	0	This study
WT-MRE11-SAE2	AM	sgs1 yku80	uGCR	PGSP4700	1	42277_42290	4	5	5	0	0	This study
sae2	A	sae2	uGCR	PGSP1987 [bzg048]	1	34339-107_34339-75	3	15	9	0	0	This study
sae2	A	sae2	uGCR	PGSP1989 [bzg049]	1	42855_42869	5	5	3	0	0	This study
sae2	A	sae2	uGCR	PGSP1990 [bzg050]	1	34339-107_34339-75	3	15	9	0	0	This study
sae2	A	sae2	uGCR	PGSP1991 [bzg051]	1	42939_42955	3	6	5	1	0	This study
sae2	A	sae2	uGCR	PGSP1992 [bzg052]	1	34339-107_34339-75	3	15	9	0	0	This study
sae2	A	sae2	uGCR	PGSP1994 [bzg053]	1	34339-107_34339-75	3	15	9	0	0	This study
sae2	A	sae2	uGCR	PGSP1995 [bzg054]	1	27444_27465 step1	10	6	2	0	0	This study
sae2	A	sae2	uGCR	PGSP1995 [bzg054]	2	27444_27465 step2	8	4	3	0	0	This study
sae2	A	sae2	uGCR	PGSP1996 [bzg055]	1	34339-107_34339-75	3	15	9	0	0	This study
sae2	A	sae2	uGCR	PGSP1997 [bzg056]	1	34339-107_34339-75	3	15	9	0	0	This study
sae2	A	sae2	uGCR	PGSP1998 [bzg057]	1	34339-107_34339-75	3	15	9	0	0	This study
sae2	A	sae2	uGCR	PGSP1999 [bzg058]	1	34339-107_34339-75	3	15	9	0	0	This study
sae2	A	sae2	uGCR	PGSP2000 [bzg059]	1	34339-107_34339-75	3	15	9	0	0	This study
sae2	A	sae2	uGCR	PGSP3633 [bzg060]	1	25817-25_25817-14	4	4	3	0	0	This study
sae2	A	sae2	uGCR	PGSP3634 [bzg061]	1	34339-107_34339-75	3	15	9	0	0	This study
sae2	A	sae2	uGCR	PGSP3636 [bzg062]	1	34339-107_34339-75	3	15	9	0	0	This study
sae2	A	sae2	uGCR	PGSP3637 [bzg063]	1	34339-107_34339-75	3	15	9	0	0	This study
sae2	A	sae2	uGCR	PGSP3638 [bzg064]	1	34339-107_34339-75	3	15	9	0	0	This study
sae2	A	sae2	uGCR	PGSP3641 [bzg065]	1	34339-107_34339-75	3	15	9	0	0	This study
sae2	A	sae2	uGCR	PGSP3642 [bzg066]	1	34339-107_34339-75	3	15	9	0	0	This study
sae2	B	sae2-S267A	uGCR	PGSP4760	1	34339-107_34339-75	3	15	9	0	0	This study
sae2	B	sae2-S267A	uGCR	PGSP4761	1	34339-107_34339-75	3	15	9	0	0	This study
sae2	B	sae2-S267A	uGCR	PGSP4762	1	34339-107_34339-75	3	15	9	0	0	This study
sae2	B	sae2-S267A	uGCR	PGSP4763	1	34339-107_34339-75	3	15	9	0	0	This study
sae2	B	sae2-S267A	uGCR	PGSP4764	1	34339-107_34339-75	3	15	9	0	0	This study
sae2	B	sae2-S267A	uGCR	PGSP4765	1	34339-107_34339-75	3	15	9	0	0	This study
sae2	B	sae2-S267A	uGCR	PGSP4766	1	34339-107_34339-75	3	15	9	0	0	This study
sae2	B	sae2-S267A	uGCR	PGSP4767	1	34339-107_34339-75	3	15	9	0	0	This study
sae2	B	sae2-S267A	uGCR	PGSP4768	1	34339-107_34339-75	3	15	9	0	0	This study
sae2	B	sae2-S267A	uGCR	PGSP4769	1	34339-107_34339-75	3	15	9	0	0	This study
sae2	B	sae2-S267A	uGCR	PGSP4770	1	34339-107_34339-75	3	15	9	0	0	This study
sae2	B	sae2-S267A	uGCR	PGSP4771	1	34339-107_34339-75	3	15	9	0	0	This study
sae2	C	sae2-MT9	uGCR	PGSP4780	1	34339-107_34339-75	3	15	9	0	0	This study
sae2	C	sae2-MT9	uGCR	PGSP4781	1	34339-107_34339-75	3	15	9	0	0	This study
sae2	C	sae2-MT9	uGCR	PGSP4782	1	25817-1303_25817-1289	3	6	4	0	0	This study
sae2	C	sae2-MT9	uGCR	PGSP4783	1	34339-107_34339-75	3	15	9	0	0	This study
sae2	C	sae2-MT9	uGCR	PGSP4784	1	34339-107_34339-75	3	15	9	0	0	This study
sae2	C	sae2-MT9	uGCR	PGSP4785	1	34339-107_34339-75	3	15	9	0	0	This study
sae2	C	sae2-MT9	uGCR	PGSP4786	1	34339-107_34339-75	3	15	9	0	0	This study
sae2	C	sae2-MT9	uGCR	PGSP4787	1	34339-107_34339-75	3	15	9	0	0	This study
sae2	C	sae2-MT9	uGCR	PGSP4788	1	34339-107_34339-75	3	15	9	0	0	This study
sae2	C	sae2-MT9	uGCR	PGSP4790	1	34339-107_34339-75	3	15	9	0	0	This study
sae2	C	sae2-MT9	uGCR	PGSP4791	1	34339-931_34339-919	3	5	4	0	0	This study
sae2	D	sae2 hotspot-del	uGCR	PGSP5000	1	39661_39681	7	7	5	0	0	This study
sae2	D	sae2 hotspot-del	uGCR	PGSP5002	1	35577_35595	3	6	3	0	4	This study
sae2	D	sae2 hotspot-del	uGCR	PGSP5003	1	29068_29103	4	10	6	2	6	This study
sae2	D	sae2 hotspot-del	uGCR	PGSP5004	1	30830_30856	7	7	3	0	5	This study
sae2	D	sae2 hotspot-del	uGCR	PGSP5005	1	25817-592_25817-574	13	5	1	0	0	This study
sae2	D	sae2 hotspot-del	uGCR	PGSP5006	1	25817-30_25820	10	10	5	2	0	This study
sae2	D	sae2 hotspot-del	uGCR	PGSP5007	1	34339-1211_34339-1196	6	5	3	0	0	This study
sae2	D	sae2 hotspot-del	uGCR	PGSP5008	1	37132_37150	7	5	3	1	0	This study
sae2	D	sae2 hotspot-del	uGCR	PGSP5009	1	25817-43_25817-20	12	6	4	0	0	This study
sae2	D	sae2 hotspot-del	uGCR	PGSP5009	2	72380_72456	5	11	5	0	0	This study
sae2	F	sae2 chrV:30843-gRNA	uGCR	PGSP4829	1	30857_30872	4	6	3	0	0	This study
sae2	F	sae2 chrV:30843-gRNA	uGCR	PGSP4830	1	30857_30872	4	6	3	0	0	This study
sae2	F	sae2 chrV:30843-gRNA	uGCR	PGSP4831	1	30857_30872	4	6	3	0	0	This study
sae2	F	sae2 chrV:30843-gRNA	uGCR	PGSP4832	1	34339-107_34339-75	3	15	9	0	0	This study
sae2	F	sae2 chrV:30843-gRNA	uGCR	PGSP4833	1	30857_30872	4	6	3	0	0	This study
sae2	F	sae2 chrV:30843-gRNA	uGCR	PGSP4834	1	30857_30872	4	6	3	0	0	This study
sae2	F	sae2 chrV:30843-gRNA	uGCR	PGSP5034	1	34339-107_34339-75	3	15	9	0	0	This study
sae2	F	sae2 chrV:30843-gRNA	uGCR	PGSP5035	1	30857_30872	4	6	3	0	0	This study
sae2	F	sae2 chrV:30843-gRNA	uGCR	PGSP5036	1	30857_30872	4	6	3	0	0	This study
sae2	H	sae2 chrV:34470-gRNA	uGCR	PGSP5039	1	30857_30872	4	6	3	0	0	This study
sae2	H	sae2 chrV:34470-gRNA	uGCR	PGSP5045	1	35581_35596	4	6	2	0	0	This study
sae2	I	sae2 chrV:25817-1754-gRNA	uGCR	PGSP4947	1	34339-107_34339-75	3	15	9	0	0	This study
sae2	I	sae2 chrV:25817-1754-gRNA	uGCR	PGSP4948	1	34339-107_34339-75	3	15	9	0	0	This study
sae2	I	sae2 chrV:25817-1754-gRNA	uGCR	PGSP4949	1	34339-107_34339-75	3	15	9	0	0	This study
sae2	I	sae2 chrV:25817-1754-gRNA	uGCR	PGSP4950	1	34339-107_34339-75	3	15	9	0	0	This study
sae2	I	sae2 chrV:25817-1754-gRNA	uGCR	PGSP4951	1	34339-107_34339-75	3	15	9	0	0	This study
sae2	I	sae2 chrV:25817-1754-gRNA	uGCR	PGSP4952	1	25817-1731_25817-1720	4	4	1	0	0	This study
sae2	I	sae2 chrV:25817-1754-gRNA	uGCR	PGSP4953	1	34339-107_34339-75	3	15	9	0	0	This study
sae2	I	sae2 chrV:25817-1754-gRNA	uGCR	PGSP4954	1	34339-107_34339-75	3	15	9	0	0	This study
sae2	I	sae2 chrV:25817-1754-gRNA	uGCR	PGSP4955	1	25817-1749_25817-1737	3	5	3	0	0	This study
sae2	I	sae2 chrV:25817-1754-gRNA	uGCR	PGSP4956	1	34339-107_34339-75	3	15	9	0	0	This study
sae2	I	sae2 chrV:25817-1754-gRNA	uGCR	PGSP4957	1	34339-107_34339-75	3	15	9	0	0	This study
sae2	J	sae2 chrV:35709-gRNA	uGCR	PGSP4958	1	35721_35754	16	9	3	0	0	This study
sae2	J	sae2 chrV:35709-gRNA	uGCR	PGSP4959	1	35721_35754	16	9	3	0	0	This study
sae2	J	sae2 chrV:35709-gRNA	uGCR	PGSP4960	1	35723_35738	4	6	3	0	0	This study
sae2	J	sae2 chrV:35709-gRNA	uGCR	PGSP4961	1	35723_35738	4	6	3	0	0	This study
sae2	J	sae2 chrV:35709-gRNA	uGCR	PGSP4962	1	35721_35754	16	9	3	0	0	This study
sae2	J	sae2 chrV:35709-gRNA	uGCR	PGSP4963	1	35723_35738	4	6	3	0	0	This study
sae2	J	sae2 chrV:35709-gRNA	uGCR	PGSP4964	1	35723_35738	4	6	3	0	0	This study
sae2	J	sae2 chrV:35709-gRNA	uGCR	PGSP4965	1	35721_35754	16	9	3	0	0	This study
sae2	J	sae2 chrV:35709-gRNA	uGCR	PGSP4966	1	35721_35754	16	9	3	0	0	This study
sae2	J	sae2 chrV:35709-gRNA	uGCR	PGSP4967	1	35723_35738	4	6	3	0	0	This study
sae2	J	sae2 chrV:35709-gRNA	uGCR	PGSP4968	1	35723_35738	4	6	3	0	0	This study
sae2	J	sae2 chrV:35709-gRNA	uGCR	PGSP4969	1	35721_35754	16	9	3	0	0	This study
sae2	K	sae2 chrV:34339-110-gRNA	uGCR	PGSP5010	1	34339-107_34339-75	3	15	9	0	0	This study
sae2	K	sae2 chrV:34339-110-gRNA	uGCR	PGSP5011	1	34339-107_34339-75	3	15	9	0	0	This study
sae2	K	sae2 chrV:34339-110-gRNA	uGCR	PGSP5012	1	34339-107_34339-75	3	15	9	0	0	This study
sae2	K	sae2 chrV:34339-110-gRNA	uGCR	PGSP5013	1	34339-107_34339-75	3	15	9	0	0	This study
sae2	K	sae2 chrV:34339-110-gRNA	uGCR	PGSP5014	1	34339-107_34339-75	3	15	9	0	0	This study
sae2	K	sae2 chrV:34339-110-gRNA	uGCR	PGSP5015	1	34339-107_34339-75	3	15	9	0	0	This study
sae2	K	sae2 chrV:34339-110-gRNA	uGCR	PGSP5016	1	34339-107_34339-75	3	15	9	0	0	This study
sae2	K	sae2 chrV:34339-110-gRNA	uGCR	PGSP5017	1	34339-107_34339-75	3	15	9	0	0	This study
sae2	K	sae2 chrV:34339-110-gRNA	uGCR	PGSP5018	1	34339-107_34339-75	3	15	9	0	0	This study
sae2	K	sae2 chrV:34339-110-gRNA	uGCR	PGSP5019	1	34339-107_34339-75	3	15	9	0	0	This study
sae2	K	sae2 chrV:34339-110-gRNA	uGCR	PGSP5020	1	34339-107_34339-75	3	15	9	0	0	This study
sae2	K	sae2 chrV:34339-110-gRNA	uGCR	PGSP5021	1	34339-107_34339-75	3	15	9	0	0	This study
sae2	N	sae2 exo1	uGCR	PGSP3683 [bzg076]	1	34339-107_34339-75	3	15	9	0	0	This study
sae2	N	sae2 exo1	uGCR	PGSP3690 [bzg077]	1	34339-107_34339-75	3	15	9	0	0	This study
sae2	N	sae2 exo1	uGCR	PGSP3696 [bzg078]	1	34339-107_34339-75	3	15	9	0	0	This study
sae2	N	sae2 exo1	uGCR	PGSP4107 [bzg081]	1	34339-107_34339-75	3	15	9	0	0	This study
sae2	N	sae2 exo1	uGCR	PGSP4116 [bzg082]	1	27074_27102	5	11	8	1	0	This study
sae2	N	sae2 exo1	uGCR	PGSP4127 [bzg084]	1	34339-1126_34339-1028	12	10	6	4	0	This study
sae2	N	sae2 exo1	uGCR	PGSP4665	1	34339-107_34339-75	3	15	9	0	0	This study
sae2	N	sae2 exo1	uGCR	PGSP4667	1	34339-107_34339-75	3	15	9	0	0	This study
sae2	N	sae2 exo1	uGCR	PGSP4668	1	34339-107_34339-75	3	15	9	0	0	This study
sae2	N	sae2 exo1	uGCR	PGSP4669	1	28829_28849	5	7	2	1	0	This study
sae2	N	sae2 exo1	uGCR	PGSP4670	1	34339-1091_34339-1066	3	10	6	1	1	This study
sae2	N	sae2 exo1	uGCR	PGSP4671	1	34339-107_34339-75	3	15	9	0	0	This study
sae2	N	sae2 exo1	uGCR	PGSP4672	1	35723_35738	4	6	3	0	0	This study
sae2	N	sae2 exo1	uGCR	PGSP4673	1	35723_35738	4	6	3	0	0	This study
sae2	N	sae2 exo1	uGCR	PGSP4674	1	34339-107_34339-75	3	15	9	0	0	This study
sae2	N	sae2 exo1	uGCR	PGSP4676	1	34339-107_34339-75	3	15	9	0	0	This study
sae2	O	sae2 exo1 chrV:25817-1754-gRNA	uGCR	PGSP5087	1	25817-1303_25817-1289	3	6	4	0	0	This study
sae2	O	sae2 exo1 chrV:25817-1754-gRNA	uGCR	PGSP5088	1	25817-1303_25817-1289	3	6	4	0	0	This study
sae2	O	sae2 exo1 chrV:25817-1754-gRNA	uGCR	PGSP5089	1	34339-107_34339-75	3	15	9	0	0	This study
sae2	O	sae2 exo1 chrV:25817-1754-gRNA	uGCR	PGSP5091	1	34339-107_34339-75	3	15	9	0	0	This study
sae2	O	sae2 exo1 chrV:25817-1754-gRNA	uGCR	PGSP5092	1	25817-1749_25817-1737	3	5	4	0	0	This study
sae2	O	sae2 exo1 chrV:25817-1754-gRNA	uGCR	PGSP5093	1	34339-107_34339-75	3	15	9	0	0	This study
sae2	O	sae2 exo1 chrV:25817-1754-gRNA	uGCR	PGSP5094	1	34339-107_34339-75	3	15	9	0	0	This study
sae2	O	sae2 exo1 chrV:25817-1754-gRNA	uGCR	PGSP5095	1	34339-107_34339-75	3	15	9	0	0	This study
sae2	O	sae2 exo1 chrV:25817-1754-gRNA	uGCR	PGSP5097	1	25817-1749_25817-1737	3	5	4	0	0	This study
sae2	AL	sae2 exo1 yku80	uGCR	PGSP5046	1	34339-107_34339-75	3	15	9	0	0	This study
sae2	AL	sae2 exo1 yku80	uGCR	PGSP5047	1	34339-107_34339-75	3	15	9	0	0	This study
sae2	AL	sae2 exo1 yku80	uGCR	PGSP5048	1	34339-107_34339-75	3	15	9	0	0	This study
sae2	AL	sae2 exo1 yku80	uGCR	PGSP5049	1	40877_40894	4	6	4	1	0	This study
sae2	AL	sae2 exo1 yku80	uGCR	PGSP5050	1	34339-107_34339-75	3	15	9	0	0	This study
sae2	AL	sae2 exo1 yku80	uGCR	PGSP5051	1	34339-107_34339-75	3	15	9	0	0	This study
sae2	AL	sae2 exo1 yku80	uGCR	PGSP5052	1	34339-107_34339-75	3	15	9	0	0	This study
sae2	AL	sae2 exo1 yku80	uGCR	PGSP5053	1	34339-107_34339-75	3	15	9	0	0	This study
sae2	AL	sae2 exo1 yku80	uGCR	PGSP5054	1	27348_27361	4	5	5	0	0	This study
sae2	AL	sae2 exo1 yku80	uGCR	PGSP5055	1	34339-107_34339-75	3	15	9	0	0	This study
sae2	AL	sae2 exo1 yku80	uGCR	PGSP5058	1	39661_39681	7	7	5	0	0	This study
sae2	AL	sae2 exo1 yku80	uGCR	PGSP5059	1	35837_35872	24	6	2	0	0	This study
sae2	W	sae2 mus81	uGCR	PGSP4651	1	34339-107_34339-75	3	15	9	0	0	This study
sae2	W	sae2 mus81	uGCR	PGSP4652	1	34339-107_34339-75	3	15	9	0	0	This study
sae2	W	sae2 mus81	uGCR	PGSP4654	1	34339-107_34339-75	3	15	9	0	0	This study
sae2	W	sae2 mus81	uGCR	PGSP4657	1	34339-107_34339-75	3	15	9	0	0	This study
sae2	W	sae2 mus81	uGCR	PGSP4658	1	34339-107_34339-75	3	15	9	0	0	This study
sae2	W	sae2 mus81	uGCR	PGSP4659	1	34339-107_34339-75	3	15	9	0	0	This study
sae2	W	sae2 mus81	uGCR	PGSP4662	1	34339-107_34339-75	3	15	9	0	0	This study
sae2	W	sae2 mus81	uGCR	PGSP4664	1	34339-107_34339-75	3	15	9	0	0	This study
sae2	X	sae2 mus81 chrV:25817-1754-gRNA	uGCR	PGSP5080	1	34339-107_34339-75	3	15	9	0	0	This study
sae2	X	sae2 mus81 chrV:25817-1754-gRNA	uGCR	PGSP5082	1	34339-107_34339-75	3	15	9	0	0	This study
sae2	X	sae2 mus81 chrV:25817-1754-gRNA	uGCR	PGSP5084	1	34339-107_34339-75	3	15	9	0	0	This study
sae2	AD	sae2 pif1	uGCR	PGPS4704	1	34339-107_34339-75	3	15	9	0	0	This study
sae2	AI	sae2 pif1 yku80	uGCR	PGSP4718	1	38072_38086	5	5	1	0	0	This study
sae2	AI	sae2 pif1 yku80	uGCR	PGSP4719	1	34339-107_34339-75	3	15	9	0	0	This study
sae2	AI	sae2 pif1 yku80	uGCR	PGSP4720	1	34339-107_34339-75	3	15	9	0	0	This study
sae2	AI	sae2 pif1 yku80	uGCR	PGSP4726	1	34339-107_34339-75	3	15	9	0	0	This study
sae2	AI	sae2 pif1 yku80	uGCR	PGSP4728	1	34339-107_34339-75	3	15	9	0	0	This study
sae2	S	sae2 pol32	uGCR	PGSP4610	1	34339-107_34339-75	3	15	9	0	0	This study
sae2	S	sae2 pol32	uGCR	PGSP4611	1	34339-107_34339-75	3	15	9	0	0	This study
sae2	S	sae2 pol32	uGCR	PGSP4614	1	34339-107_34339-75	3	15	9	0	0	This study
sae2	S	sae2 pol32	uGCR	PGSP4615	1	34339-107_34339-75	3	15	9	0	0	This study
sae2	S	sae2 pol32	uGCR	PGSP4617	1	34339-640_34339-630	3	4	4	0	0	This study
sae2	S	sae2 pol32	uGCR	PGSP4618	1	34339-107_34339-75	3	15	9	0	0	This study
sae2	S	sae2 pol32	uGCR	PGSP4619	1	34339-107_34339-75	3	15	9	0	0	This study
sae2	S	sae2 pol32	uGCR	PGSP4620	1	34339-107_34339-75	3	15	9	0	0	This study
sae2	S	sae2 pol32	uGCR	PGSP4622	1	34339-107_34339-75	3	15	9	0	0	This study
sae2	S	sae2 pol32	uGCR	PGSP4624	1	34339-107_34339-75	3	15	9	0	0	This study
sae2	U	sae2 rad10	uGCR	PGSP4581 [bzg133]	1	34339-107_34339-75	3	15	9	0	0	This study
sae2	U	sae2 rad10	uGCR	PGSP4582 [bzg134]	1	34339-107_34339-75	3	15	9	0	0	This study
sae2	U	sae2 rad10	uGCR	PGSP4583 [bzg135]	1	34339-107_34339-75	3	15	9	0	0	This study
sae2	U	sae2 rad10	uGCR	PGSP4584 [bzg136]	1	38848_38871	4	9	4	1	0	This study
sae2	U	sae2 rad10	uGCR	PGSP4585 [bzg137]	1	35478_35494	7	5	3	0	0	This study
sae2	U	sae2 rad10	uGCR	PGSP4586 [bzg138]	1	34339-107_34339-75	3	15	9	0	0	This study
sae2	U	sae2 rad10	uGCR	PGSP4587 [bzg139]	1	25817-568_25817-546	5	9	0	0	0	This study
sae2	U	sae2 rad10	uGCR	PGSP4587 [bzg139]	2	84266_84283	4	7	3	0	0	This study
sae2	U	sae2 rad10	uGCR	PGSP4588 [bzg140]	1	25817-592_25817-574	13	5	1	0	0	This study
sae2	U	sae2 rad10	uGCR	PGSP4589 [bzg141]	1	34339-1091_34339-1066	3	10	7	1	1	This study
sae2	U	sae2 rad10	uGCR	PGSP4590 [bzg142]	1	26572_28017	1427	6	4	2	0	This study
sae2	U	sae2 rad10	uGCR	PGSP4591 [bzg143]	1	26466_26538	52	8	5	2	0	This study
sae2	AP	sae2 rad52	uGCR	PGSP4877	1	34339-107_34339-75	3	15	9	0	0	This study
sae2	AP	sae2 rad52	uGCR	PGSP4878	1	27569_27583	3	6	3	0	0	This study
sae2	AP	sae2 rad52	uGCR	PGSP4882	1	34339-107_34339-75	3	15	9	0	0	This study
sae2	AP	sae2 rad52	uGCR	PGSP4883	1	34339-107_34339-75	3	15	9	0	0	This study
sae2	AP	sae2 rad52	uGCR	PGSP4884	1	29418_29435	8	5	2	0	0	This study
sae2	AP	sae2 rad52	uGCR	PGSP4884	2	51934_51962	5	11	7	1	0	This study
sae2	AP	sae2 rad52	uGCR	PGSP4887	1	42939_42955	3	6	4	1	0	This study
sae2	AP	sae2 rad52	uGCR	PGSP4889	1	34339-107_34339-75	3	15	9	0	0	This study
sae2	AP	sae2 rad52	uGCR	PGSP4890	1	34339-107_34339-75	3	15	9	0	0	This study
sae2	Q	sae2 rrm3	uGCR	PGSP4595 [bzg145]	1	34339-107_34339-75	3	15	9	0	0	This study
sae2	Q	sae2 rrm3	uGCR	PGSP4596 [bzg146]	1	42939_42955	3	6	4	1	0	This study
sae2	Q	sae2 rrm3	uGCR	PGSP4600 [bzg150]	1	30857_30872	4	6	3	0	0	This study
sae2	Q	sae2 rrm3	uGCR	PGSP4602 [bzg152]	1	27348_27361	4	5	5	0	0	This study
sae2	Q	sae2 rrm3	uGCR	PGSP4603 [bzg153]	1	34339-107_34339-75	3	15	9	0	0	This study
sae2	Q	sae2 rrm3	uGCR	PGSP4604 [bzg154]	1	34339-107_34339-75	3	15	9	0	0	This study
sae2	Q	sae2 rrm3	uGCR	PGSP4606 [bzg156]	1	25817-568_25817-546	5	9	0	0	0	This study
sae2	AN	sae2 sgs1 yku80	uGCR	PGSP4739	1	34339-107_34339-75	3	15	9	0	0	This study
sae2	AN	sae2 sgs1 yku80	uGCR	PGSP4740	1	34339-107_34339-75	3	15	9	0	0	This study
sae2	AN	sae2 sgs1 yku80	uGCR	PGSP4742	1	25817-568_25817-546	5	9	0	0	0	This study
sae2	AN	sae2 sgs1 yku80	uGCR	PGSP4744	1	41350_41363	4	5	2	0	0	This study
sae2	AN	sae2 sgs1 yku80	uGCR	PGSP4918	1	42109_42130 step1	12	5	4	0	0	This study
sae2	AN	sae2 sgs1 yku80	uGCR	PGSP4918	2	42109_42130 step2	7	6	4	0	0	This study
sae2	AN	sae2 sgs1 yku80	uGCR	PGSP4919	1	42939_42955	3	6	4	1	0	This study
sae2	AN	sae2 sgs1 yku80	uGCR	PGSP4920	1	34339-107_34339-75	3	15	9	0	0	This study
sae2	AN	sae2 sgs1 yku80	uGCR	PGSP4921	1	40968_40983	4	6	2	0	0	This study
sae2	AN	sae2 sgs1 yku80	uGCR	PGSP4922	1	25817-1529_25817-1505	15	5	1	0	0	This study
sae2	AN	sae2 sgs1 yku80	uGCR	PGSP4924	1	chr15 hotspot equivalent	3	15	9	0	0	This study
sae2	Z	sae2 slx1	uGCR	PGSP4864	1	34339-107_34339-75	3	15	9	0	0	This study
sae2	Z	sae2 slx1	uGCR	PGSP4865	1	34339-107_34339-75	3	15	9	0	0	This study
sae2	Z	sae2 slx1	uGCR	PGSP4866	1	34339-107_34339-75	3	15	9	0	0	This study
sae2	Z	sae2 slx1	uGCR	PGSP4867	1	34339-107_34339-75	3	15	9	0	0	This study
sae2	Z	sae2 slx1	uGCR	PGSP4869	1	34339-107_34339-75	3	15	9	0	0	This study
sae2	Z	sae2 slx1	uGCR	PGSP4870	1	34339-107_34339-75	3	15	9	0	0	This study
sae2	Z	sae2 slx1	uGCR	PGSP4871	1	34339-107_34339-75	3	15	9	0	0	This study
sae2	Z	sae2 slx1	uGCR	PGSP4872	1	34339-107_34339-75	3	15	9	0	0	This study
sae2	Z	sae2 slx1	uGCR	PGSP4873	1	27074_27102	5	11	8	1	0	This study
sae2	Z	sae2 slx1	uGCR	PGSP4874	1	29513_29529	5	6	2	0	0	This study
sae2	Z	sae2 slx1	uGCR	PGSP4875	1	34339-107_34339-75	3	15	9	0	0	This study
sae2	Z	sae2 slx1	uGCR	PGSP4876	1	34339-107_34339-75	3	15	9	0	0	This study
sae2	L	sae2 tel1	uGCR	PGSP3669 [bzg067]	1	25817-30_25820	10	10	5	2	0	This study
sae2	L	sae2 tel1	uGCR	PGSP3670 [bzg068]	1	25817-1303_25817-1289	3	6	4	0	0	This study
sae2	L	sae2 tel1	uGCR	PGSP3671 [bzg069]	1	25817-568_25817-546	5	9	0	0	0	This study
sae2	L	sae2 tel1	uGCR	PGSP3672 [bzg070]	1	34339-107_34339-75	3	15	9	0	0	This study
sae2	L	sae2 tel1	uGCR	PGSP3674 [bzg071]	1	34339-107_34339-75	3	15	9	0	0	This study
sae2	L	sae2 tel1	uGCR	PGSP3675 [bzg072]	1	34339-107_34339-75	3	15	9	0	0	This study
sae2	L	sae2 tel1	uGCR	PGSP3678 [bzg073]	1	34339-107_34339-75	3	15	9	0	0	This study
sae2	L	sae2 tel1	uGCR	PGSP3681 [bzg074]	1	34339-107_34339-75	3	15	9	0	0	This study
sae2	L	sae2 tel1	uGCR	PGSP3682 [bzg075]	1	34339-107_34339-75	3	15	9	0	0	This study
sae2	L	sae2 tel1	uGCR	PGSP4010 [bzg079]	1	34339-107_34339-75	3	15	9	0	0	This study
sae2	L	sae2 tel1	uGCR	PGSP4045 [bzg080]	1	34339-107_34339-75	3	15	9	0	0	This study
sae2	AB	sae2 yen1	uGCR	PGSP4849	1	34339-107_34339-75	3	15	9	0	0	This study
sae2	AB	sae2 yen1	uGCR	PGSP4850	1	34339-107_34339-75	3	15	9	0	0	This study
sae2	AB	sae2 yen1	uGCR	PGSP4851	1	34339-107_34339-75	3	15	9	0	0	This study
sae2	AB	sae2 yen1	uGCR	PGSP4852	1	34339-107_34339-75	3	15	9	0	0	This study
sae2	AB	sae2 yen1	uGCR	PGSP4853	1	34339-107_34339-75	3	15	9	0	0	This study
sae2	AB	sae2 yen1	uGCR	PGSP4854	1	34339-107_34339-75	3	15	9	0	0	This study
sae2	AB	sae2 yen1	uGCR	PGSP4855	1	34339-107_34339-75	3	15	9	0	0	This study
sae2	AB	sae2 yen1	uGCR	PGSP4856	1	34339-107_34339-75	3	15	9	0	0	This study
sae2	AB	sae2 yen1	uGCR	PGSP4857	1	34339-107_34339-75	3	15	9	0	0	This study
sae2	AB	sae2 yen1	uGCR	PGSP4858	1	34339-91_34339-46	30	8	4	0	0	This study
sae2	AB	sae2 yen1	uGCR	PGSP4859	1	34339-107_34339-75	3	15	9	0	0	This study
sae2	AB	sae2 yen1	uGCR	PGSP4860	1	34339-107_34339-75	3	15	9	0	0	This study
sae2	AH	sae2 yku80	uGCR	PGSP4677	1	34339-107_34339-75	3	15	9	0	0	This study
sae2	AH	sae2 yku80	uGCR	PGSP4678	1	34339-107_34339-75	3	15	9	0	0	This study
sae2	AH	sae2 yku80	uGCR	PGSP4679	1	34339-107_34339-75	3	15	9	0	0	This study
sae2	AH	sae2 yku80	uGCR	PGSP4680	1	34339-107_34339-75	3	15	9	0	0	This study
sae2	AH	sae2 yku80	uGCR	PGSP4682	1	34339-107_34339-75	3	15	9	0	0	This study
sae2	AH	sae2 yku80	uGCR	PGSP4684	1	34339-107_34339-75	3	15	9	0	0	This study
sae2	AH	sae2 yku80	uGCR	PGSP4685	1	34339-107_34339-75	3	15	9	0	0	This study
sae2	AH	sae2 yku80	uGCR	PGSP4686	1	34339-107_34339-75	3	15	9	0	0	This study
sae2	AH	sae2 yku80	uGCR	PGSP4687	1	34339-107_34339-75	3	15	9	0	0	This study
sae2	AH	sae2 yku80	uGCR	PGSP4688	1	34339-107_34339-75	3	15	9	0	0	This study
sae2	AH	sae2 yku80	uGCR	PGSP4690	1	34339-107_34339-75	3	15	9	0	0	This study
