# Supplementary material for: Mechanisms underlying genome instability mediated by formation of foldback inversions in Saccharomyces cerevisiae
Source: eLife journal article supplement (doi:10.7554/elife.58223), 2020-08-07
Supplement: supp [file elife_poa_e58223_Figure_2_figure_supplement_1.pdf › elife_poa_e58223_Figure_2_figure_supplement_1.pdf]

Figure 2 - figure supplement 1 (page 1 of 32)

A. chrV L 25,817-2,487\_39,967 hairpin

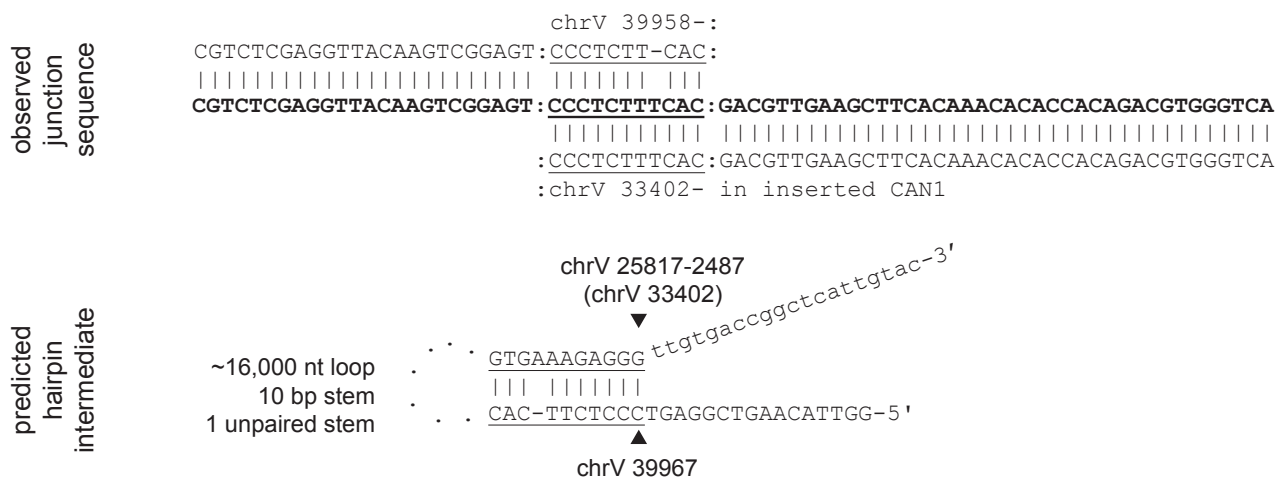

B. chrV L 25,817-1,749\_25,817-1,737 hairpin

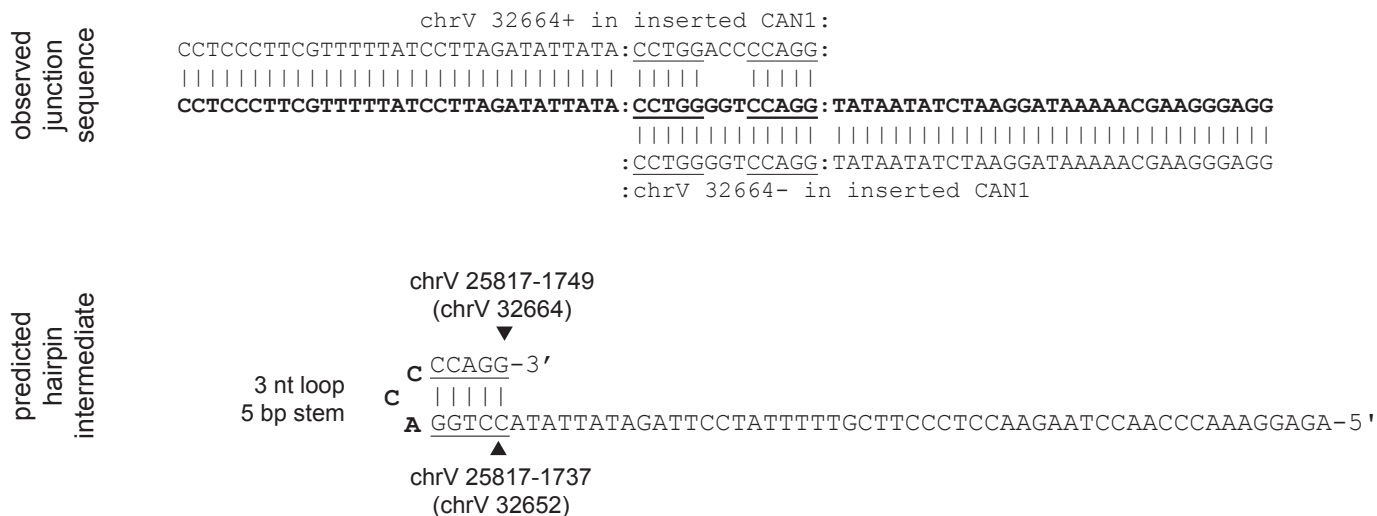

Figure 2 - figure supplement 1 (page 2 of 32)

C. chrV L 25,817-1,731\_25,817\_-1,720 hairpin

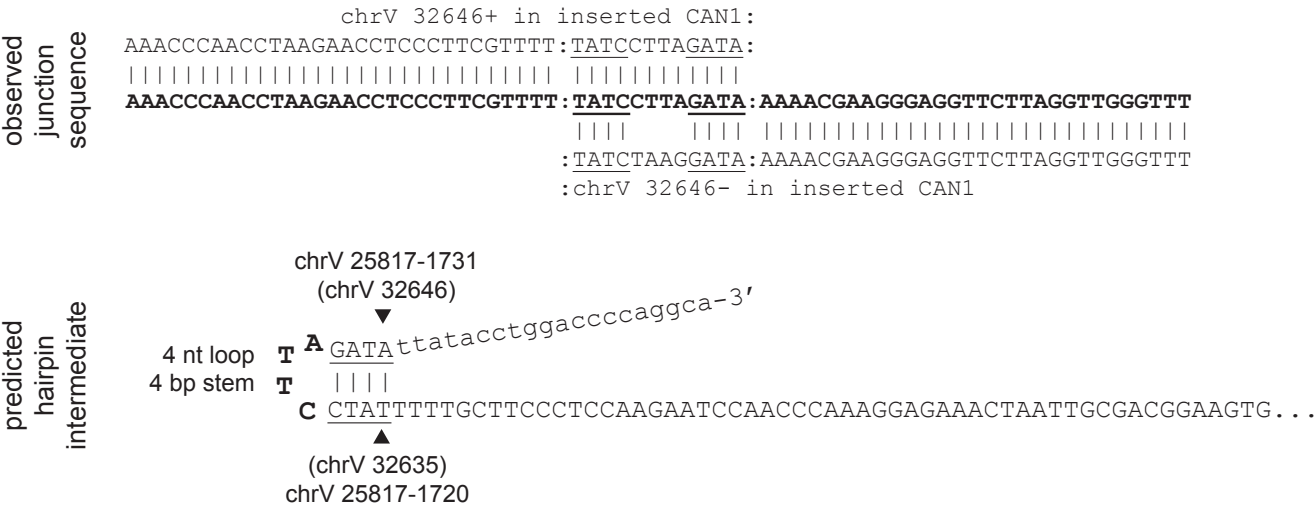

D. chrV L 25,817-1,529\_25,817-1,505 hairpin

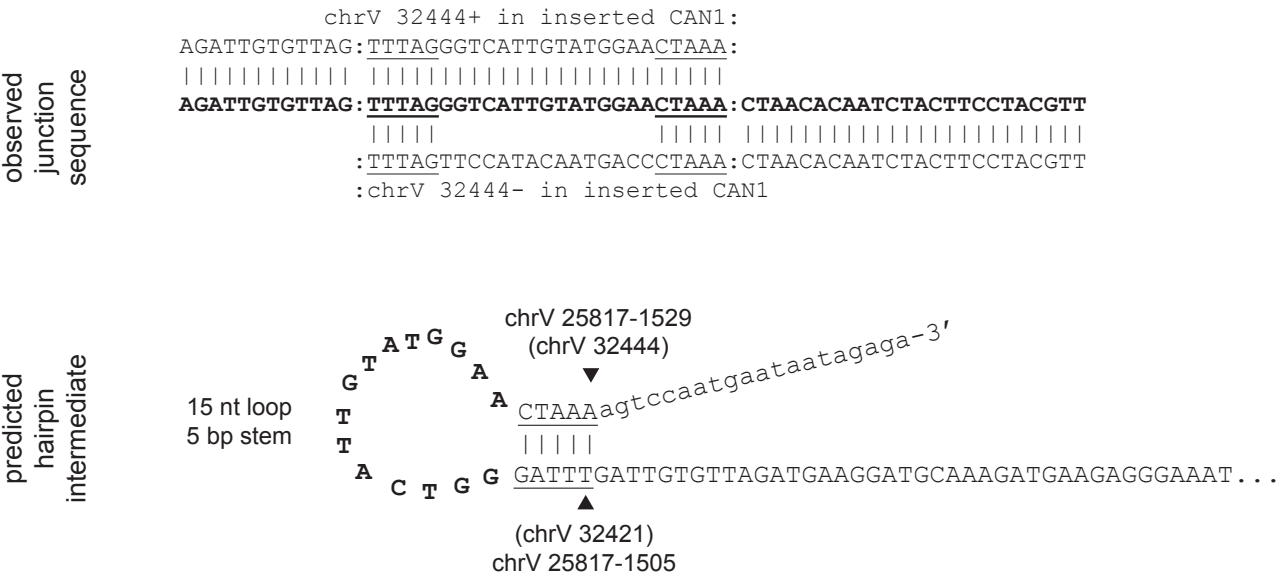

Figure 2 - figure supplement 1 (page 3 of 32)

E. chrV L 25,817-1,303\_25,817-1,289 hairpin

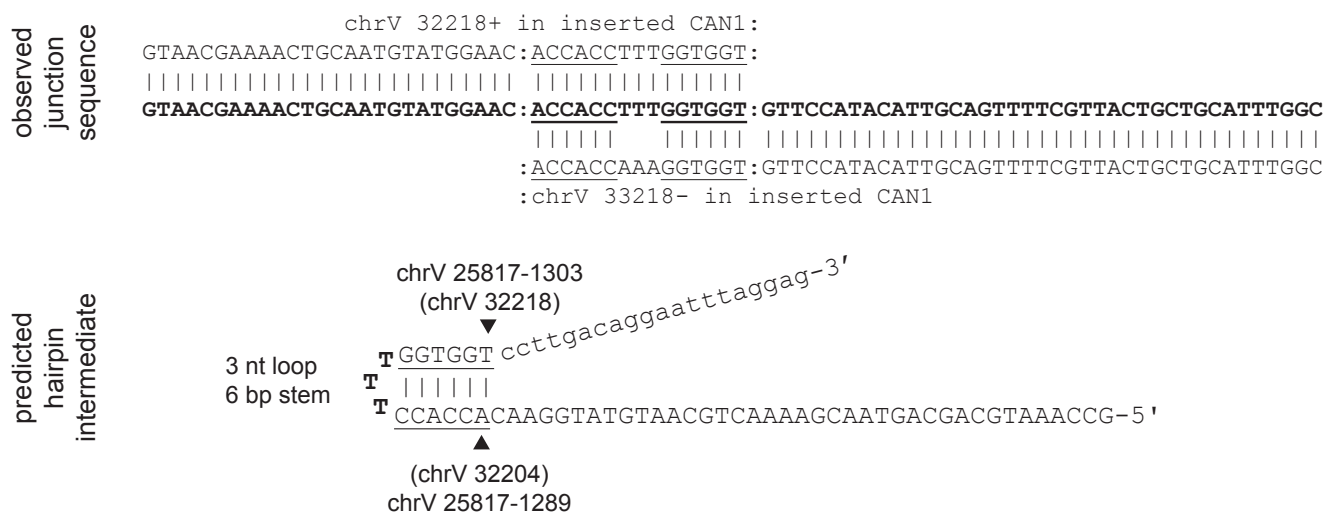

F. chrV L 25,817-592\_25,817-570 hairpin

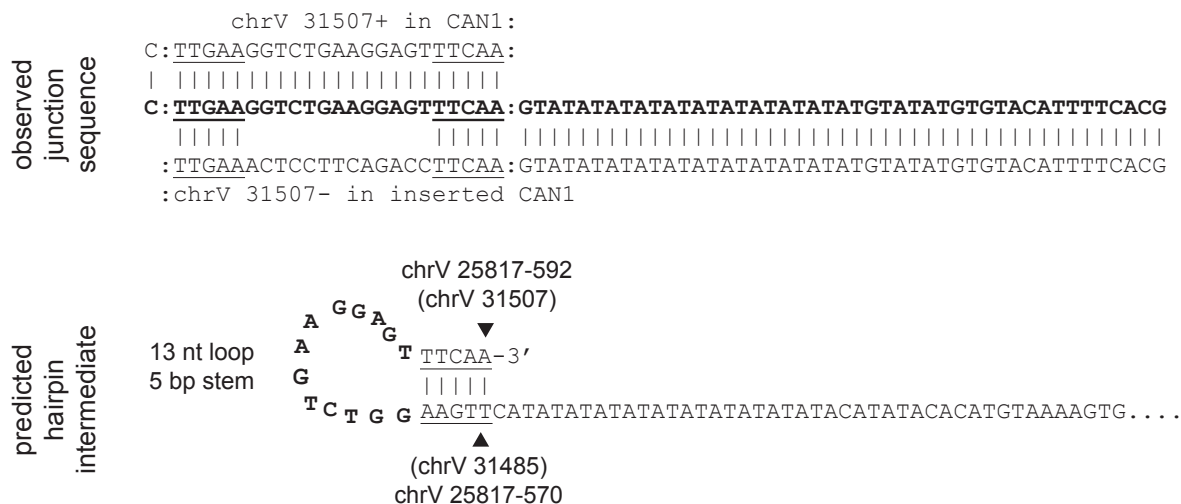

Figure 2 - figure supplement 1 (page 4 of 32)

G. chrV L 25,817-568\_25,817-546 hairpin

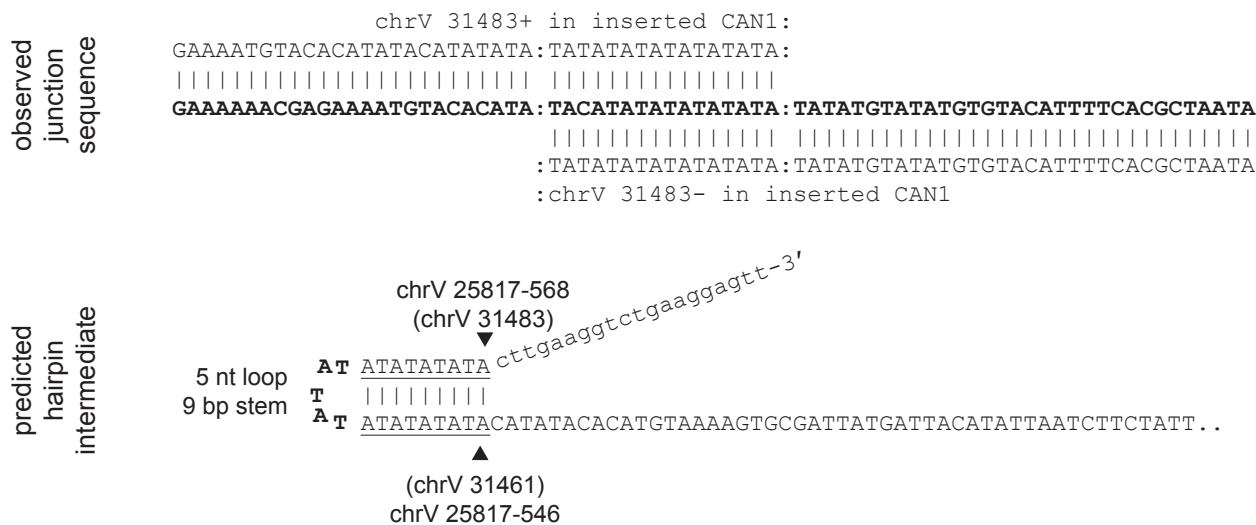

H. chrV L 25,817-43\_25,817-20 hairpin

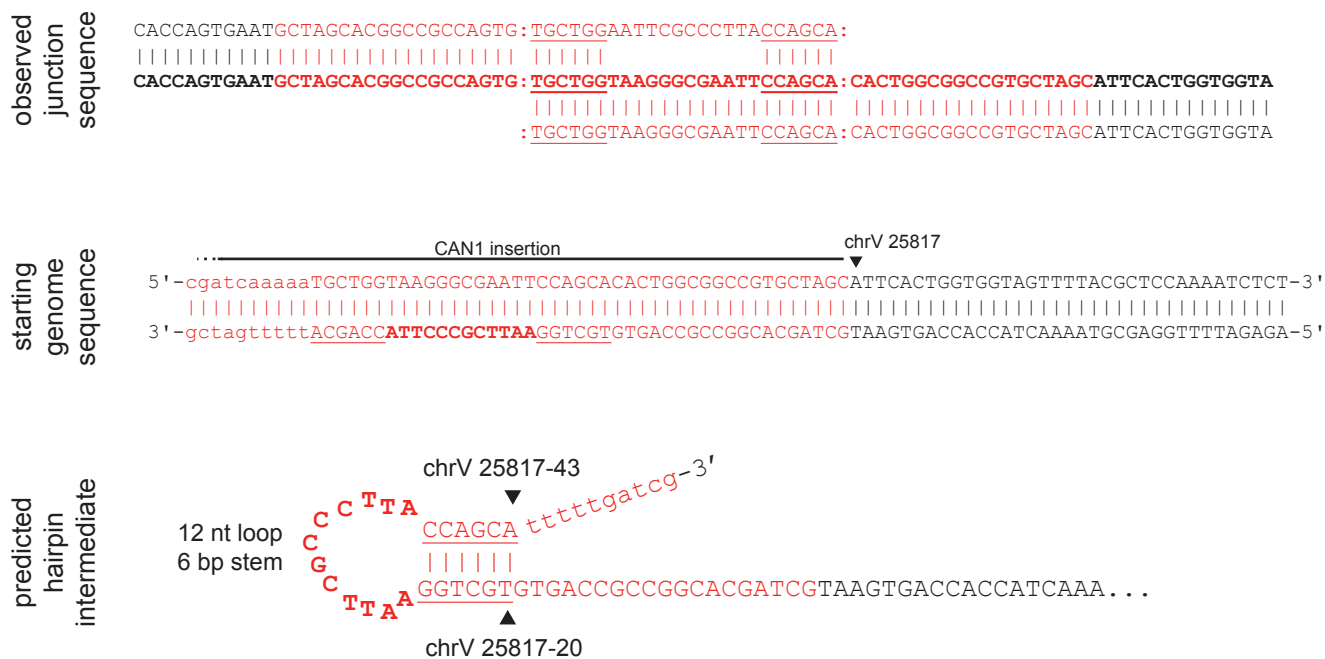

Figure 2 - figure supplement 1 (page 5 of 32)

I. chrV L 25,817-30\_25,820 hairpin

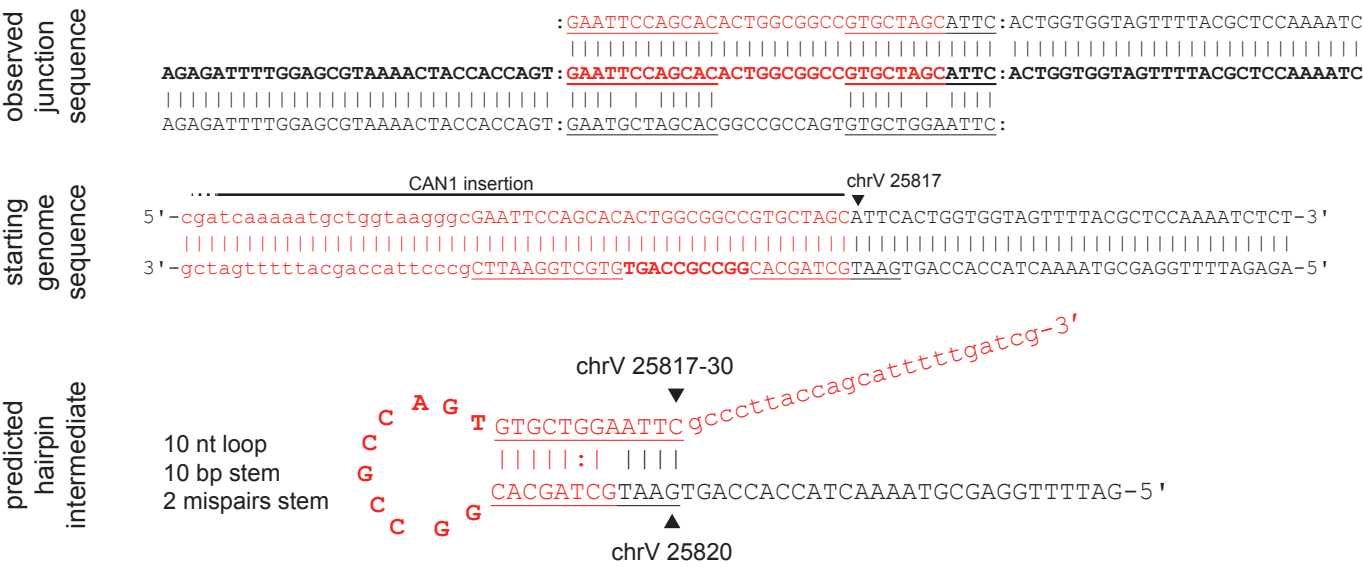

J. chrV L 25,817-25\_25,817-14 hairpin

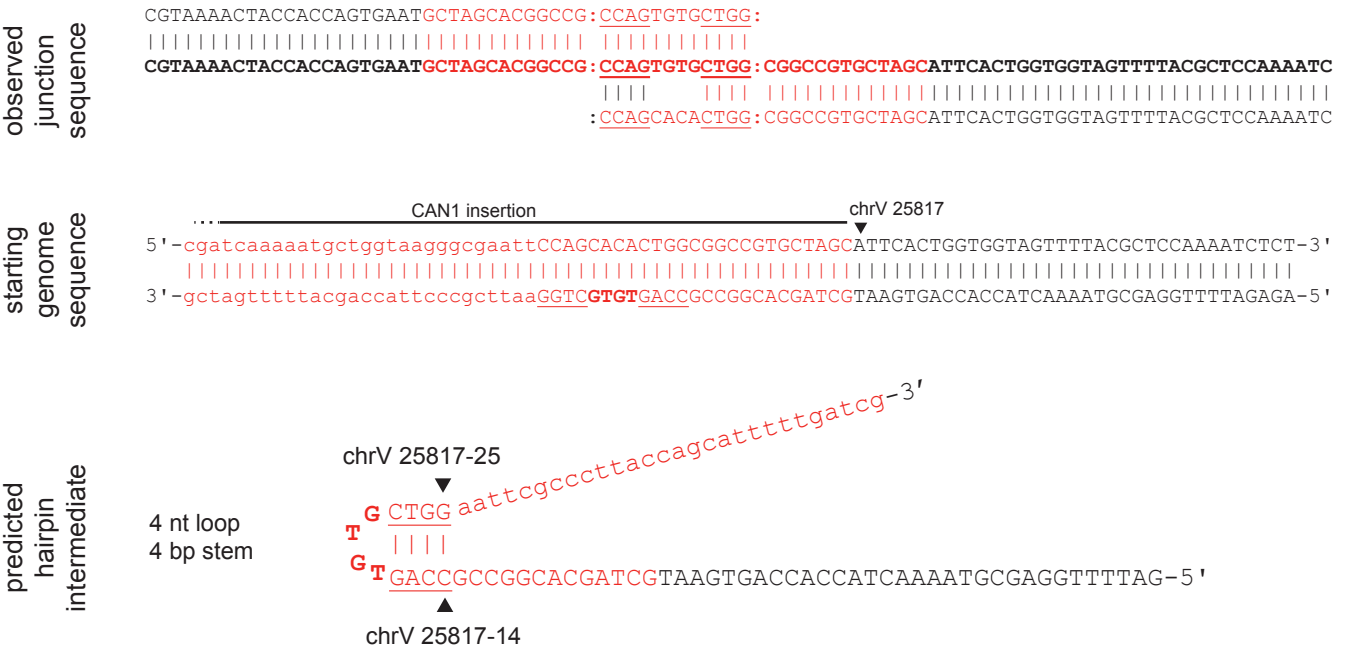

Figure 2 - figure supplement 1 (page 6 of 32)

K. chrV L 25,965\_26,002 hairpin

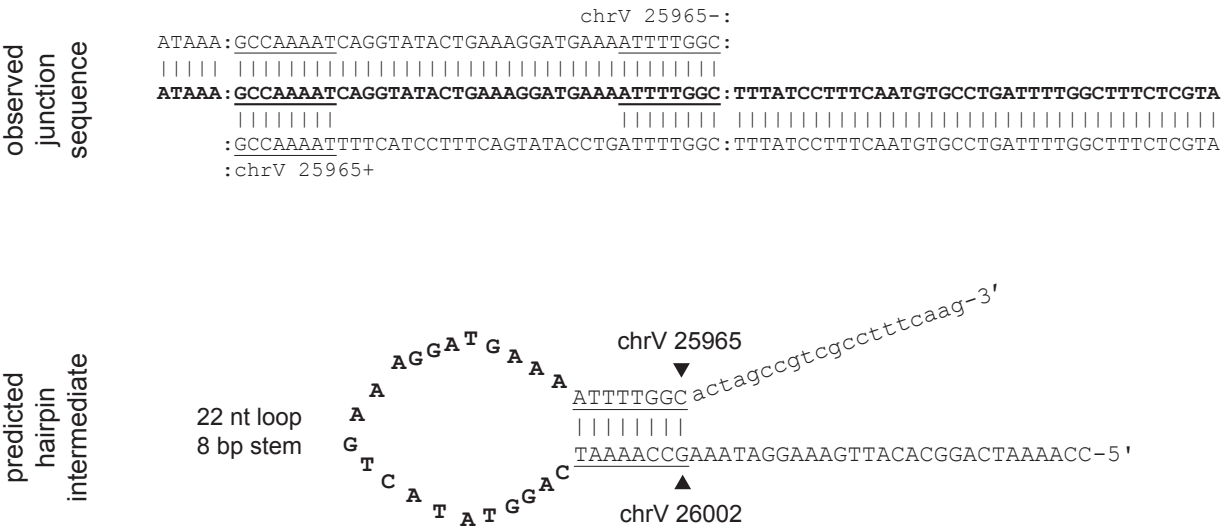

L. chrV L 26,457\_26,474 hairpin

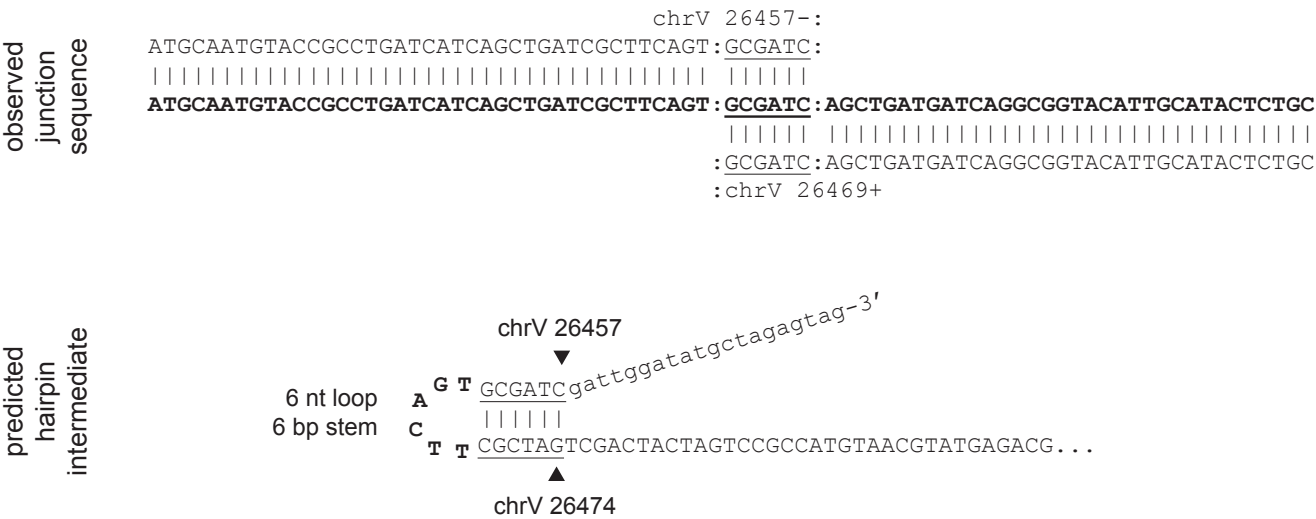

Figure 2 - figure supplement 1 (page 7 of 32)

M. chrV L 26,466\_26,538 hairpin

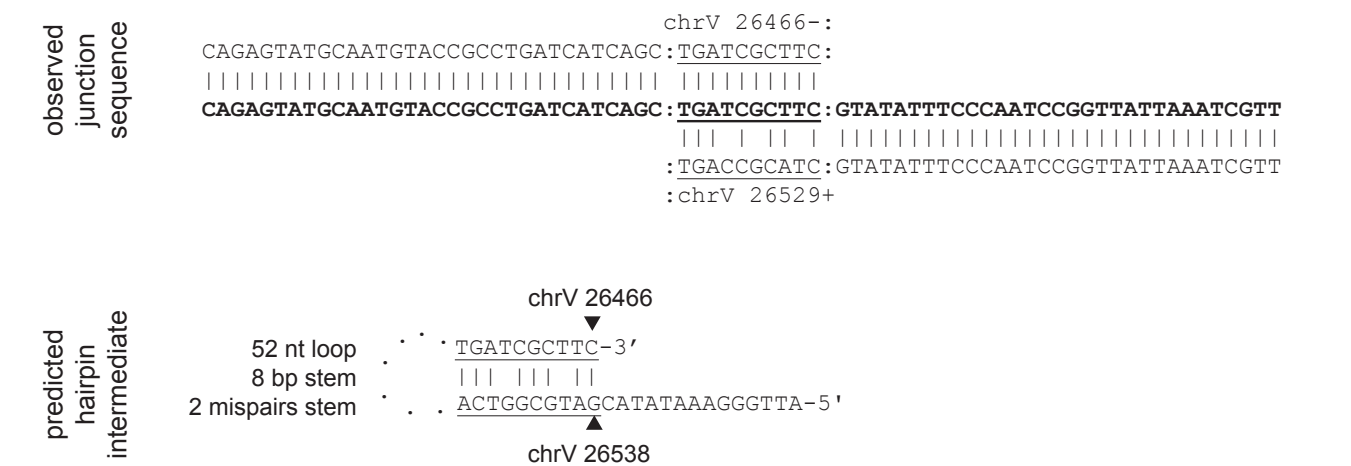

N. chrV L 26,572\_28,017 hairpin

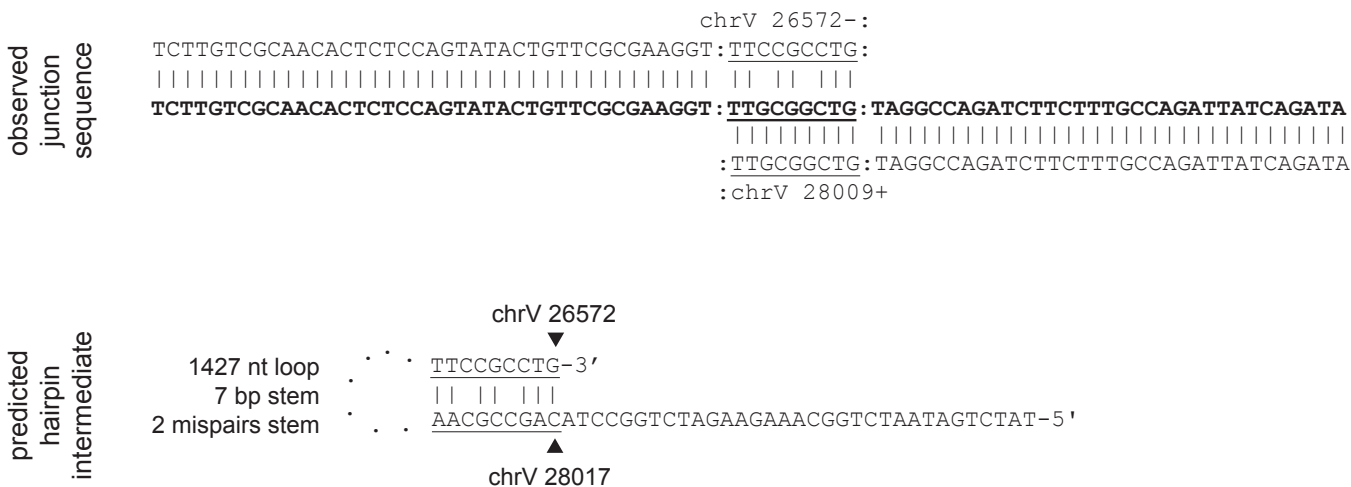

Figure 2 - figure supplement 1 (page 8 of 32)

O. chrV L 27,074\_27,102 hairpin

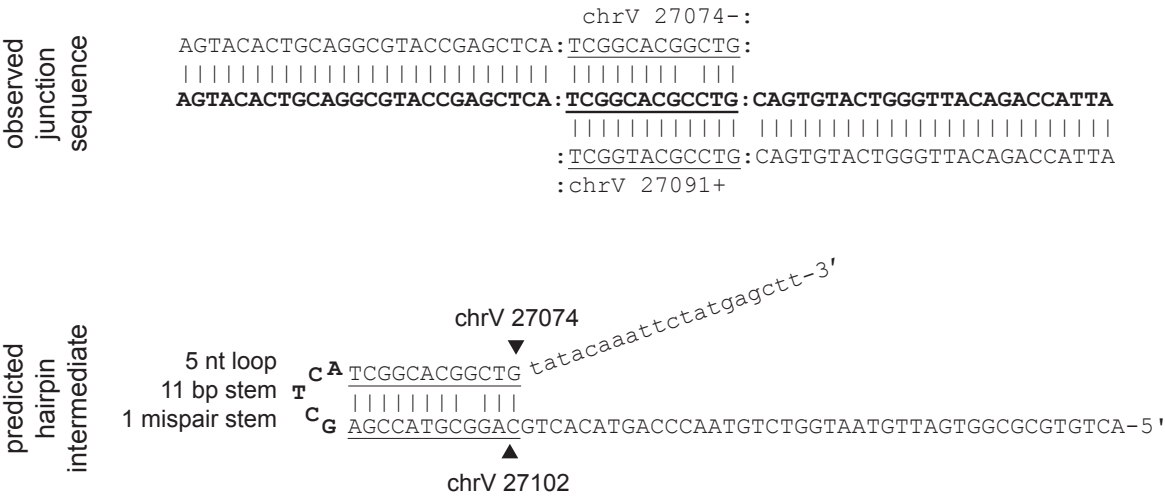

P. chrV L 27,348\_27,361 hairpin

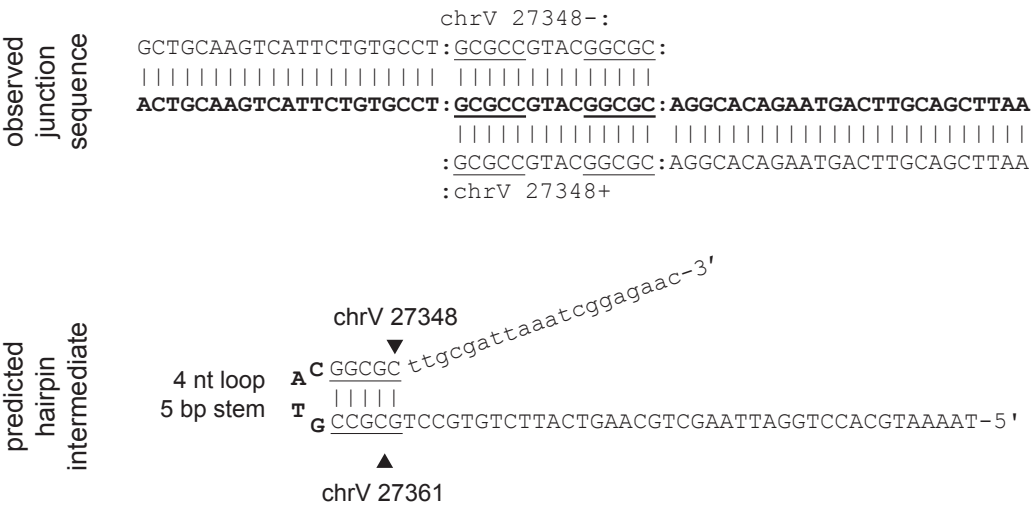



Figure 2 - figure supplement 1 (page 9 of 32)

Q. chrV L 27,569\_27,583 hairpin

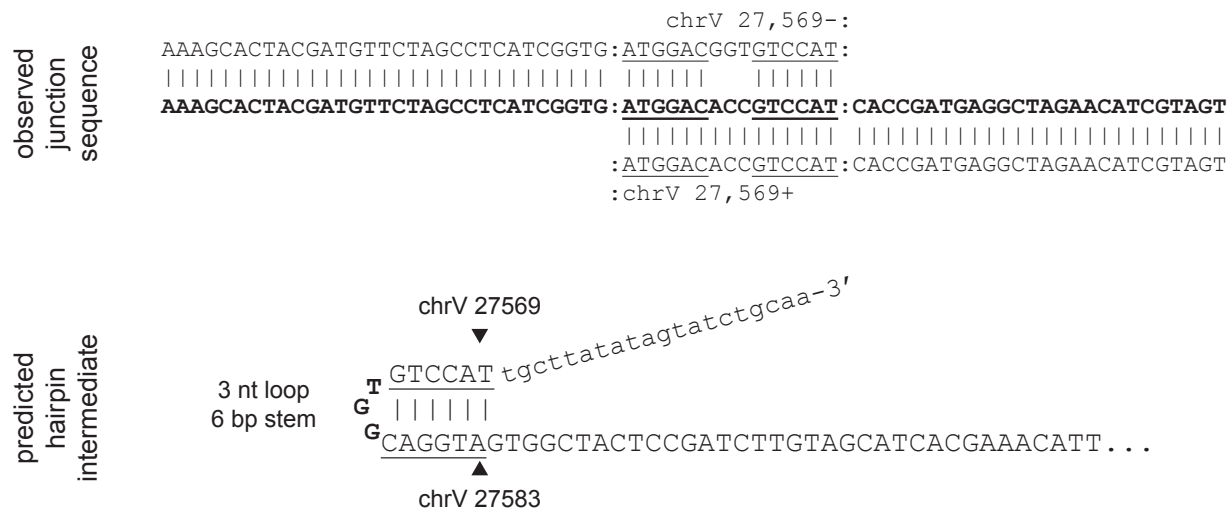

R. chrV L 28,829\_28,849 hairpin

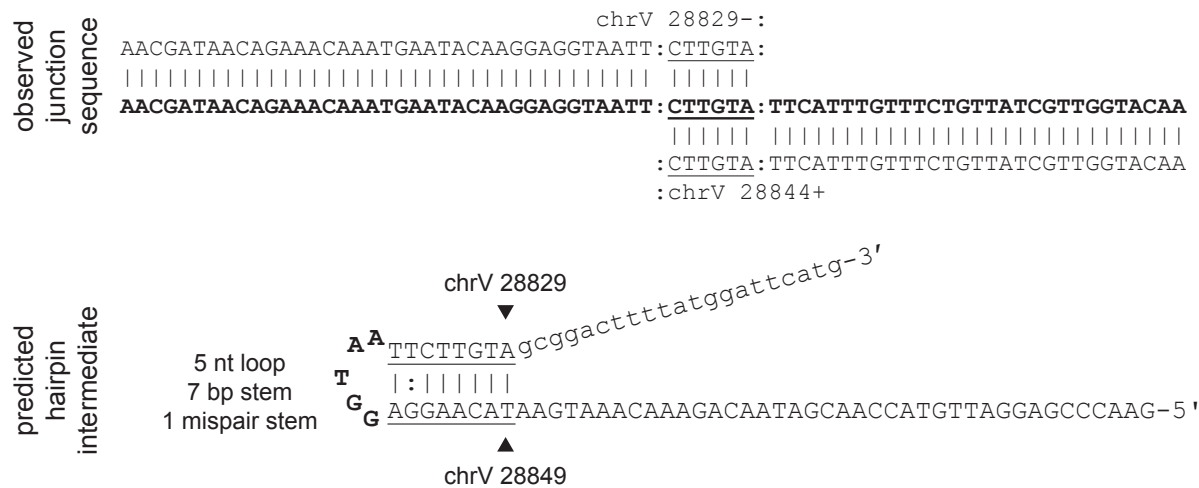

Figure 2 - figure supplement 1 (page 10 of 32)

S. chrV L 29,068\_29,103 hairpin

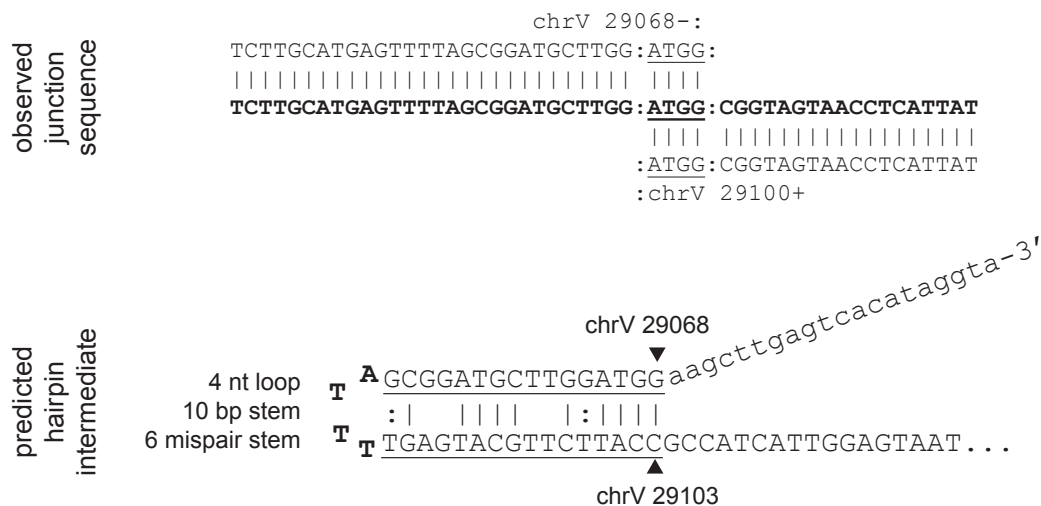

T. chrV L 29,418\_29,435 hairpin

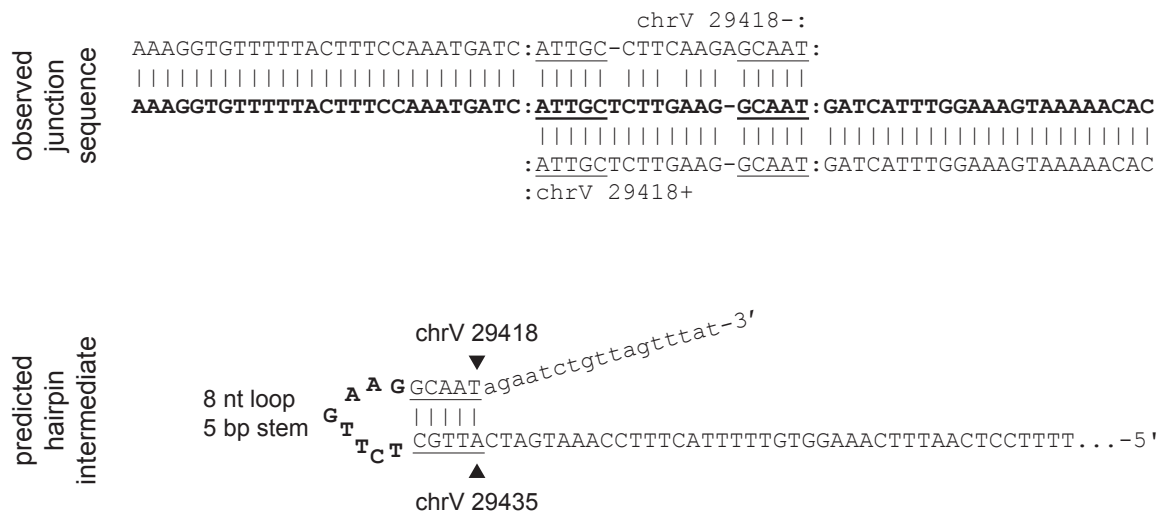

Figure 2 - figure supplement 1 (page 11 of 32)

U. chrV L 29,503\_29,539 hairpin

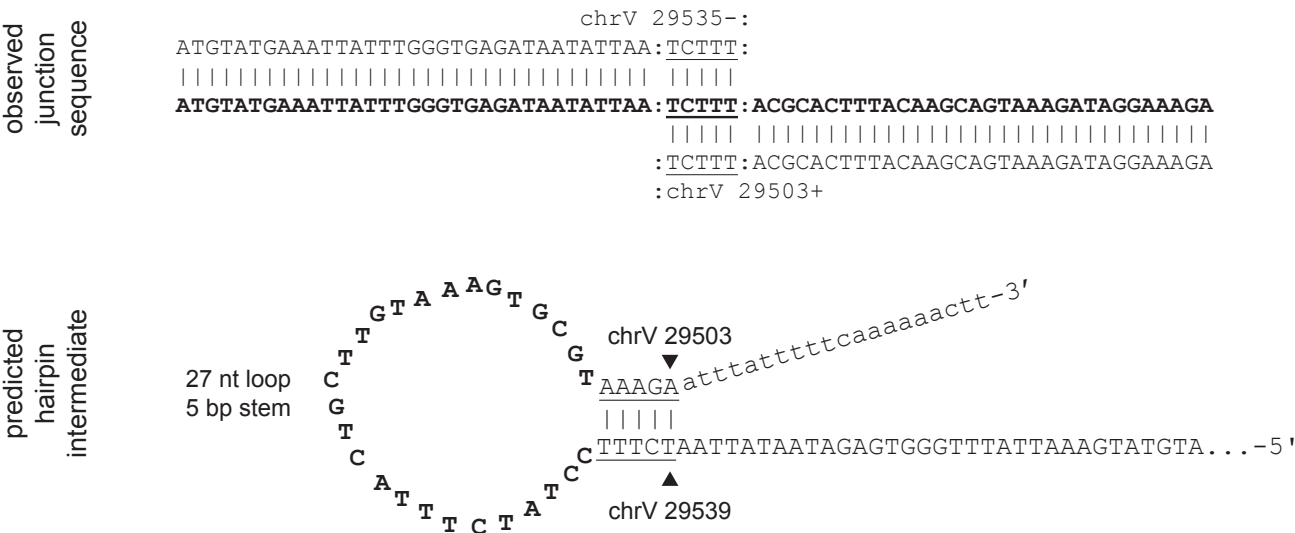

V. chrV L 29,513\_29,529 hairpin

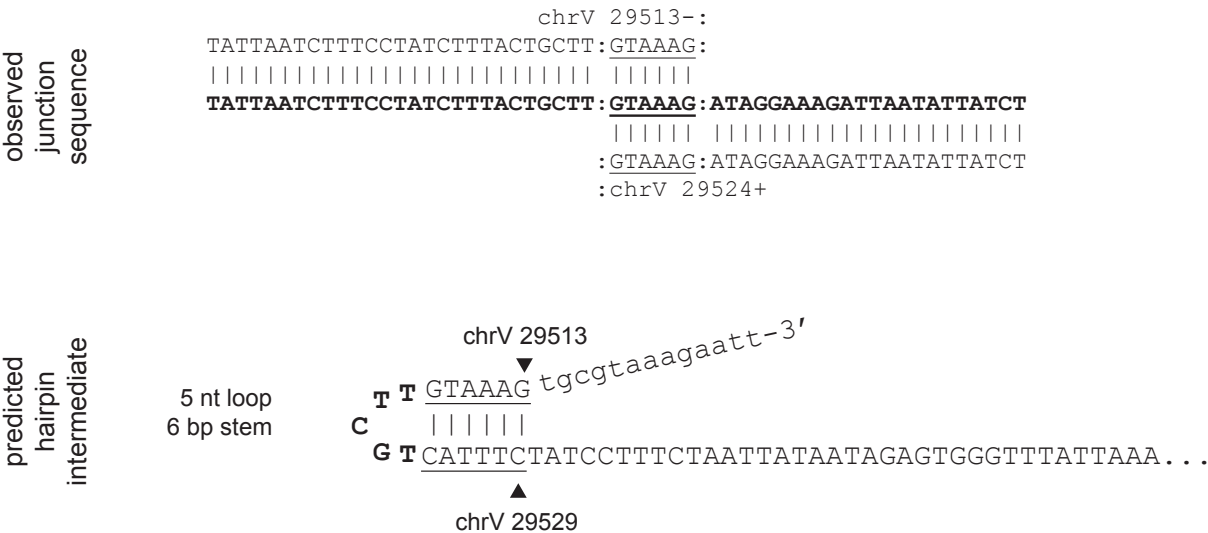

Figure 2 - figure supplement 1 (page 12 of 32)

W. chrV L 30,830\_30,856 hairpin

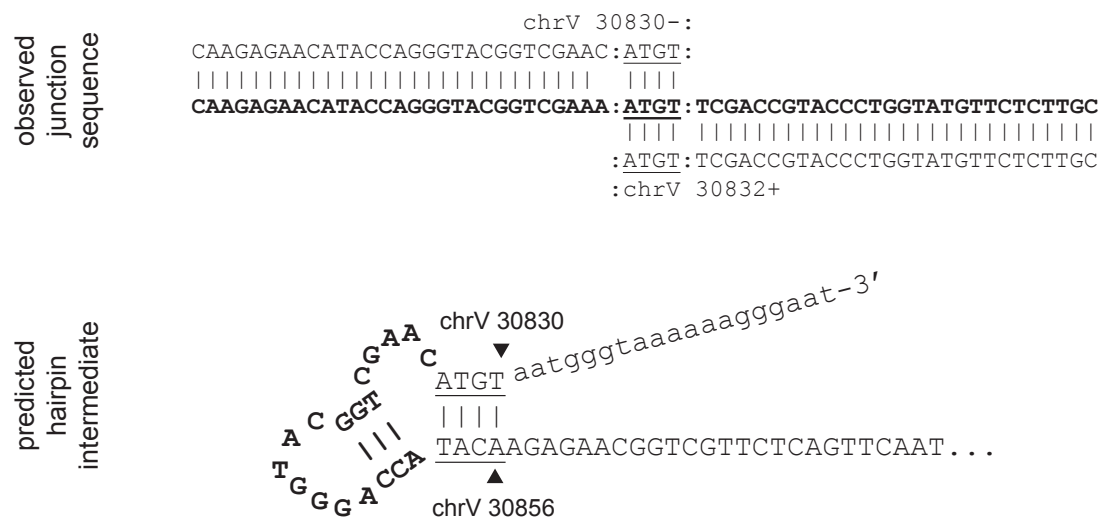

X. chrV L 30,857\_30,872 hairpin

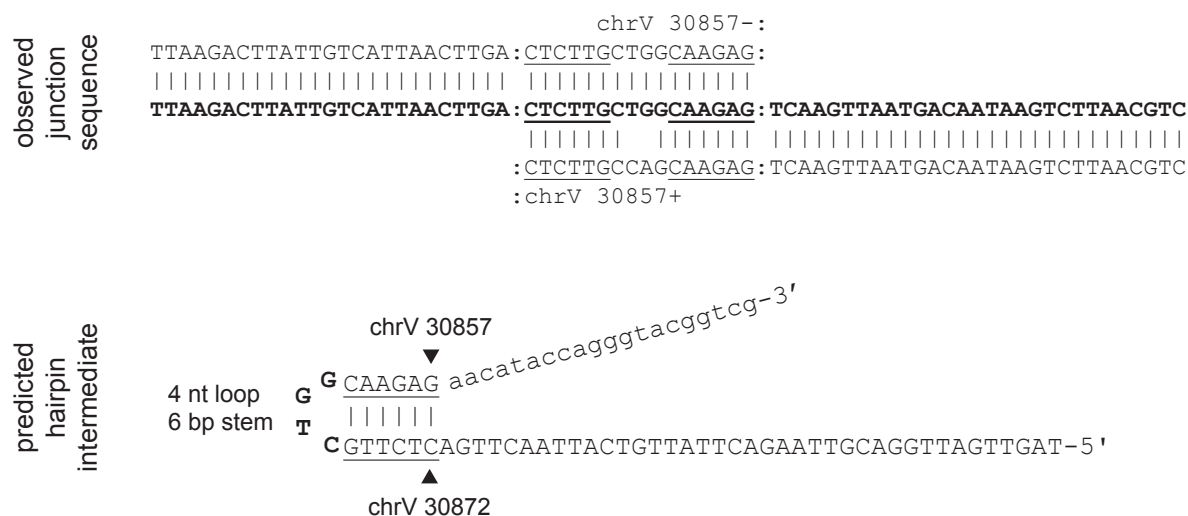

Figure 2 - figure supplement 1 (page 13 of 32)

Y. chrV L 34,339-1,219\_34,339-501 hairpin

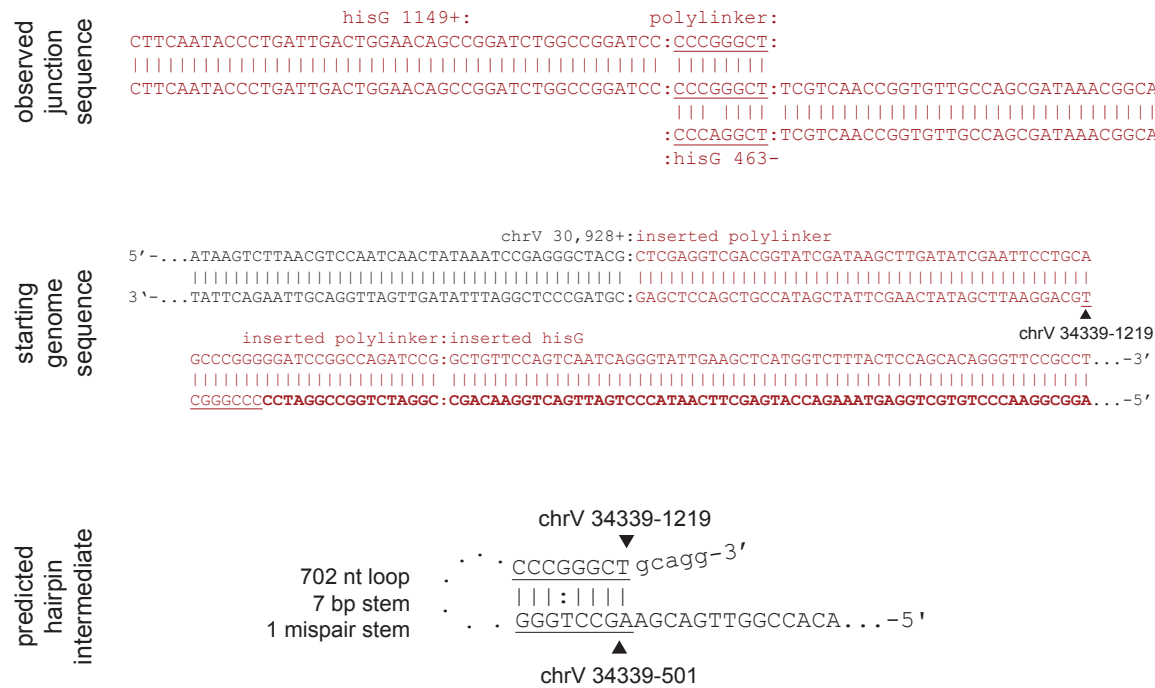

Z. chrV L 34,339-1,211\_34,339-1,196 hairpin

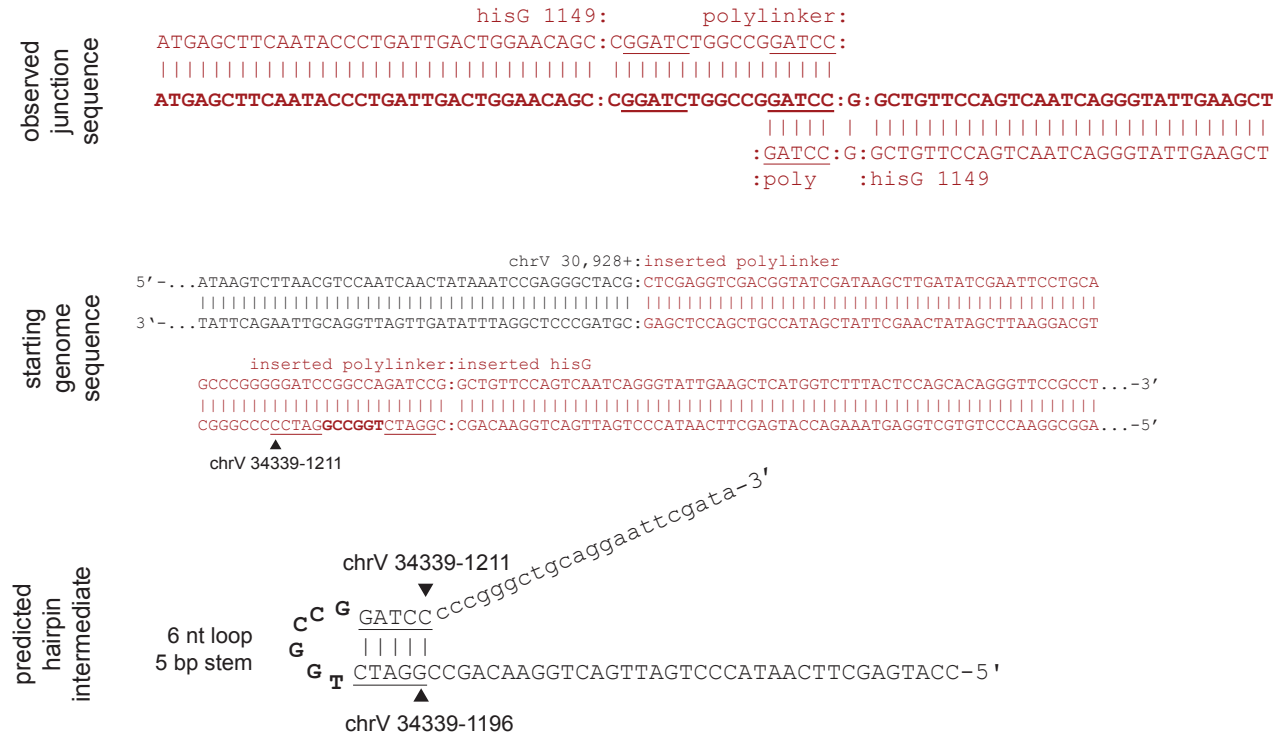

**Figure 2 - figure supplement 1 (page 14 of 32)**

**AA.** chrV L 34,339-1,126\_34,339-1,028 hairpin

observed  
junction  
sequence

GCCTGATGGCGCTGCGCTTATCAGGCCTACGTAATGCGTTGATATTTT : GGGTTCTGTAGGCC :  
|||||  
GCCTGATGGCGCTGCGCTTATCAGGCCTACGTAATGCGTTGATATTTT : GGGTTCTGTAGGCC : TGATAAGCGCAGCGCCATCAGGCG  
| : |||  
: GCATTACGTAGGCC : TGATAAGCGCAGCGCCATCAGGCG

predicted  
hairpin  
intermediate

chrV 34339-1126

12 nt loop A T T T  
10 bp stem T A | : | | : | | | |  
4 mispairs stem G T T G CGTAATGCATCCGGACTATTCGCGTCGCGGTAGTCCGCAGTCTAGTGAGGTAGTAGAAG-5'

chrV 34339-1028

**AB.** chrV L 34,339-1,091\_34,339-1,066 hairpin

observed junction sequence

hisG:  
TCTGGTACTGCCGATCGAGAAGATGATGGAGTGATCTG:ACGCCTGAT:  
|||||  
TCTGGTACTGCCGATCGAGAAGATGATGGAGTGATCTG:ACGCCTGAT:AAGCGCAGCGCCATCAGGCGTCAGATCACTCCAT  
|||||  
:ACGCCTGAT:AAGCGCAGCGCCATCAGGCGTCAGATCACTCCAT  
:hisG

predicted hairpin intermediate

3 nt loop  
10 bp stem  
1 mispair stem  
1 unpaired stem

chrV 34339-1091

chrV 34339-1066

T G CGCTTATCAGGC ctacgtaatgcgttgatattt-3'

C GCG-GTAGTCCGCAGTCTAGTGAGGTAGTAGAAGAGCTAGCCGTCATGGTCTTAG-5'

**Figure 2 - figure supplement 1 (page 15 of 32)**

**AC. chrV L 34,339-953\_34,339-883 hairpin**

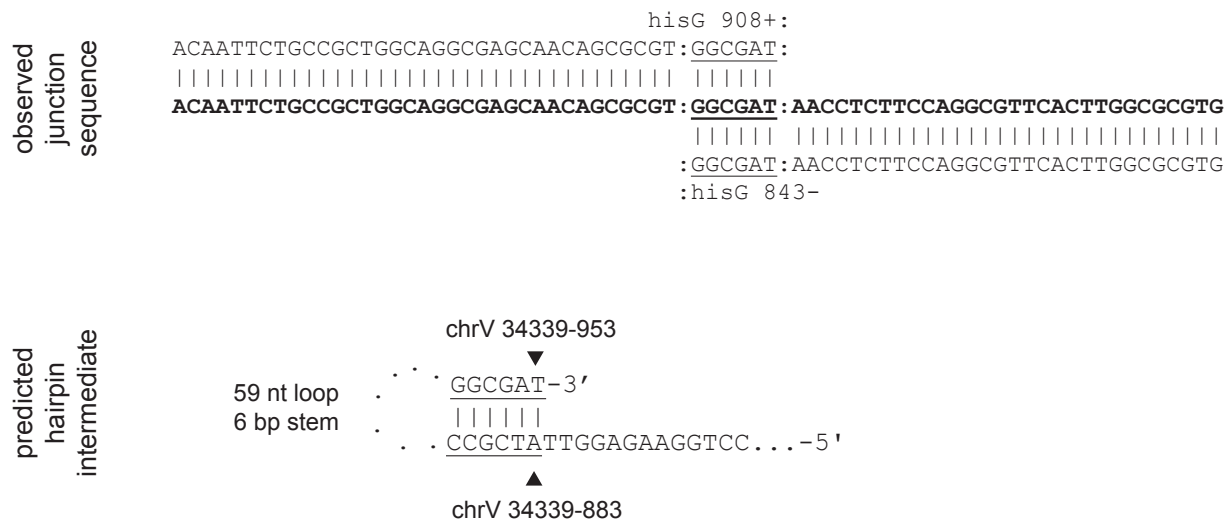

**AD. chrV L 34,339-931\_34,339-919 hairpin**

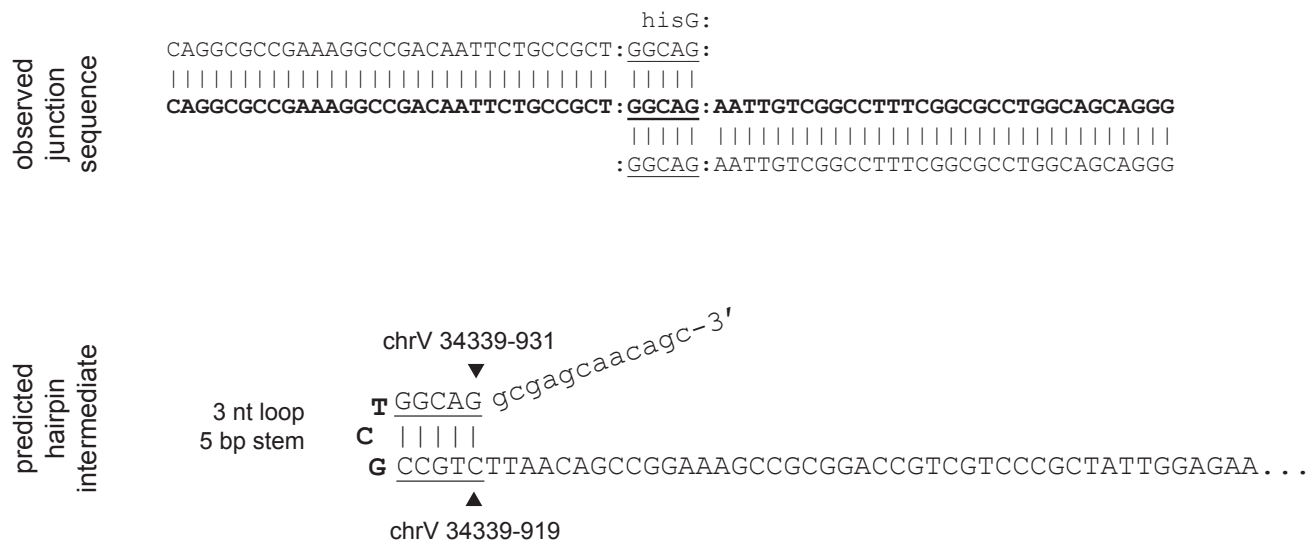

Figure 2 - figure supplement 1 (page 16 of 32)

**AE. chrV L 34,339-871\_34,339-814 hairpin**

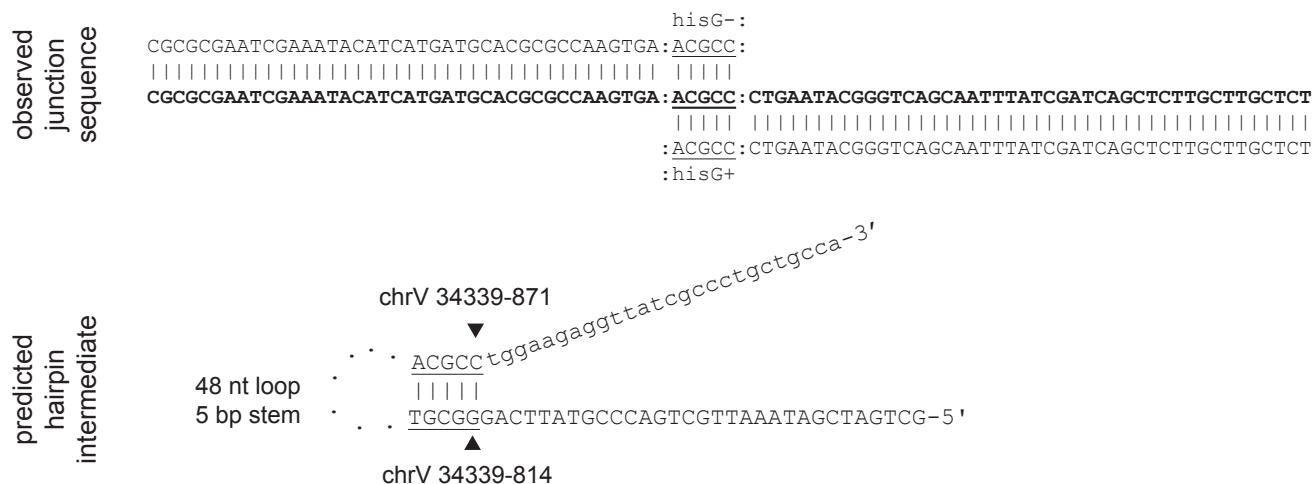

**AF. chrV L 34,339-640\_34,339-630 hairpin**

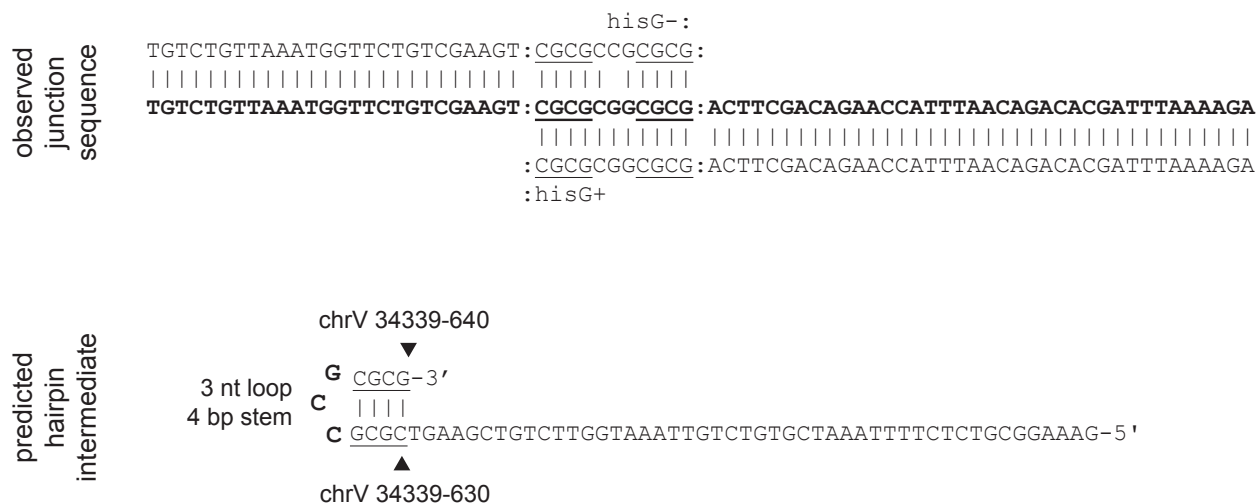



Figure 2 - figure supplement 1 (page 17 of 32)

AG. chrV L 34,339-502\_34,339-459 hairpin

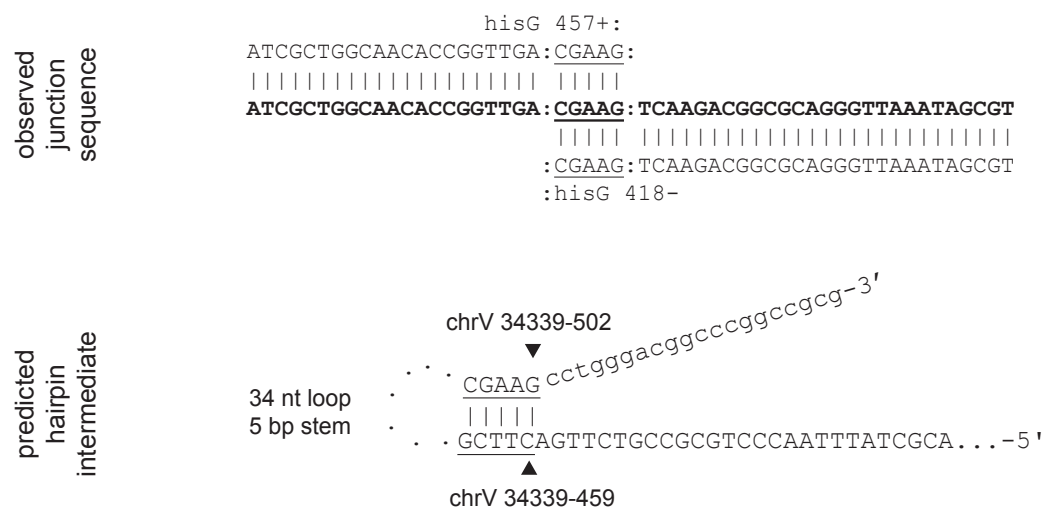

AH. chrV L 34,339-107\_34,339-75 hairpin

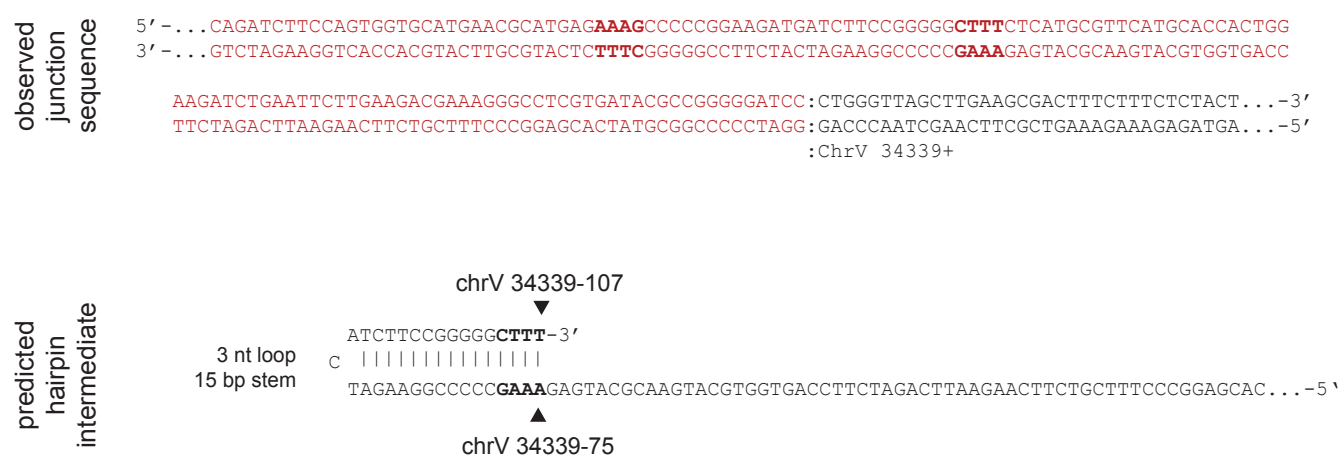

Figure 2 - figure supplement 1 (page 18 of 32)

**AI.** chrV L 34,339-91\_34,338-46 hairpin

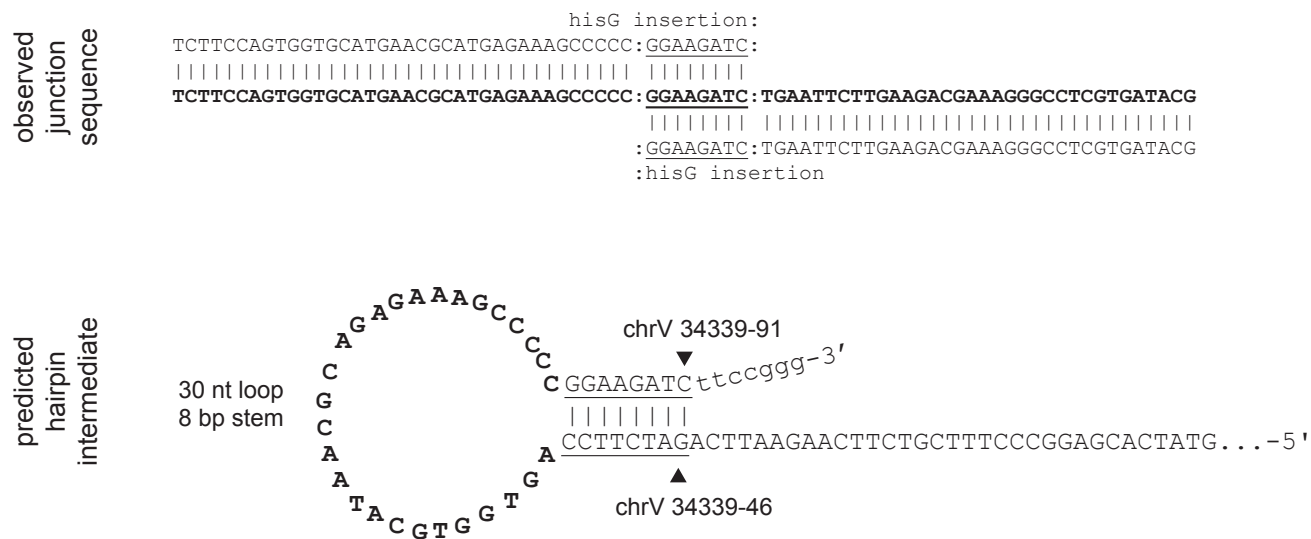

**AJ.** chrV L 34,759\_36,909 hairpin

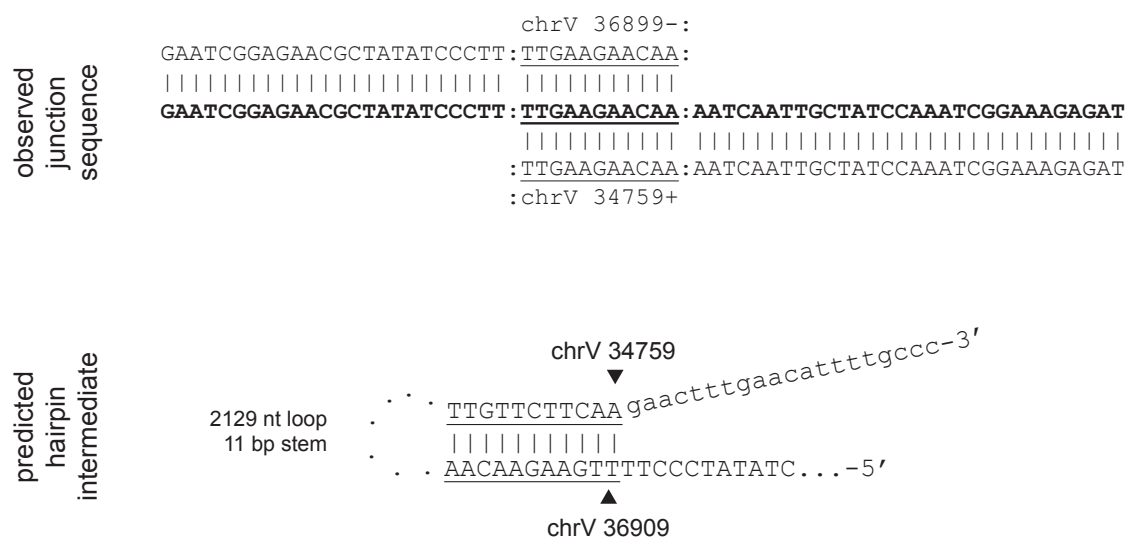

Figure 2 - figure supplement 1 (page 19 of 32)

AK. chrV L 35,447\_37,677 hairpin

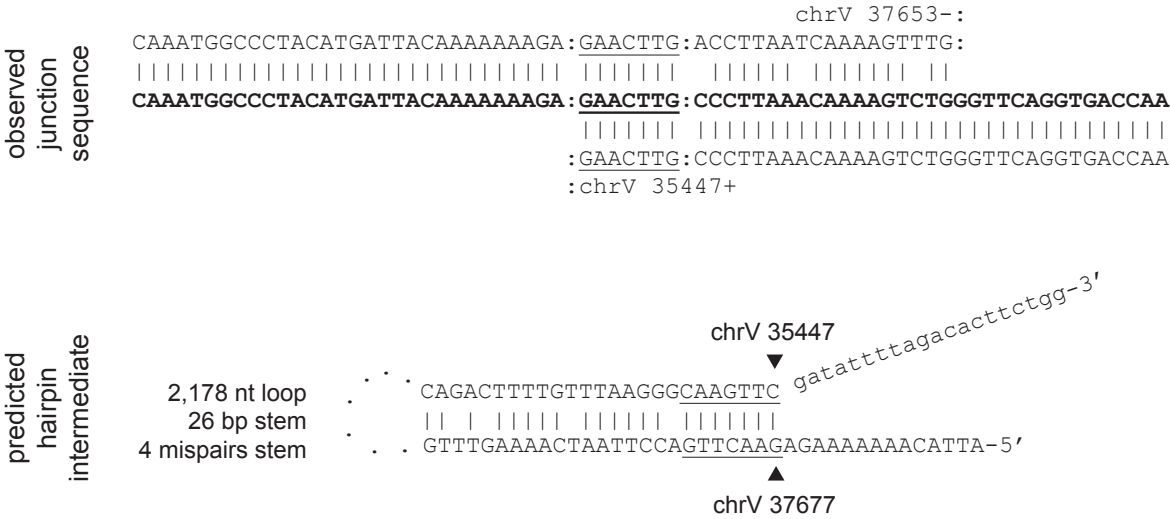

AL. chrV L 35,478\_35,494 hairpin

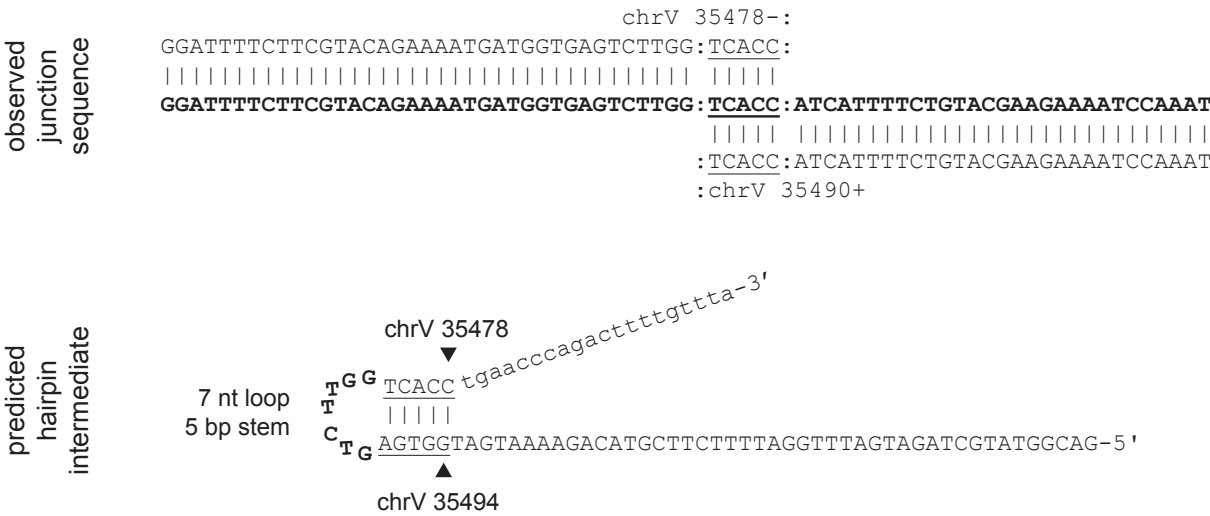

Figure 2 - figure supplement 1 (page 20 of 32)

AM. chrV L 35,577\_35,595 hairpin

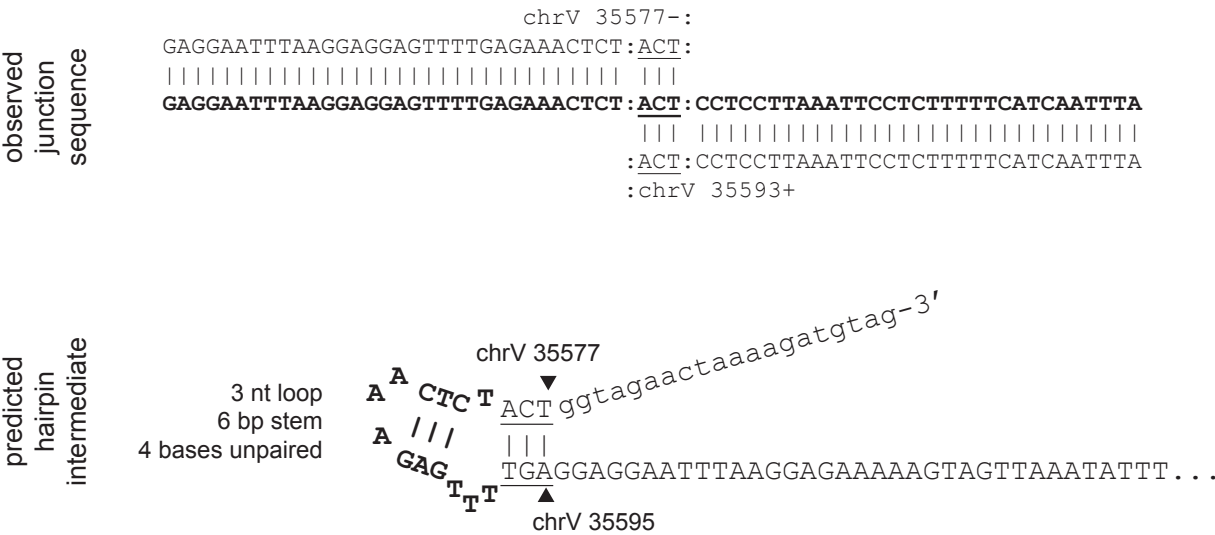

AN. chrV L 35,581\_35,596 hairpin

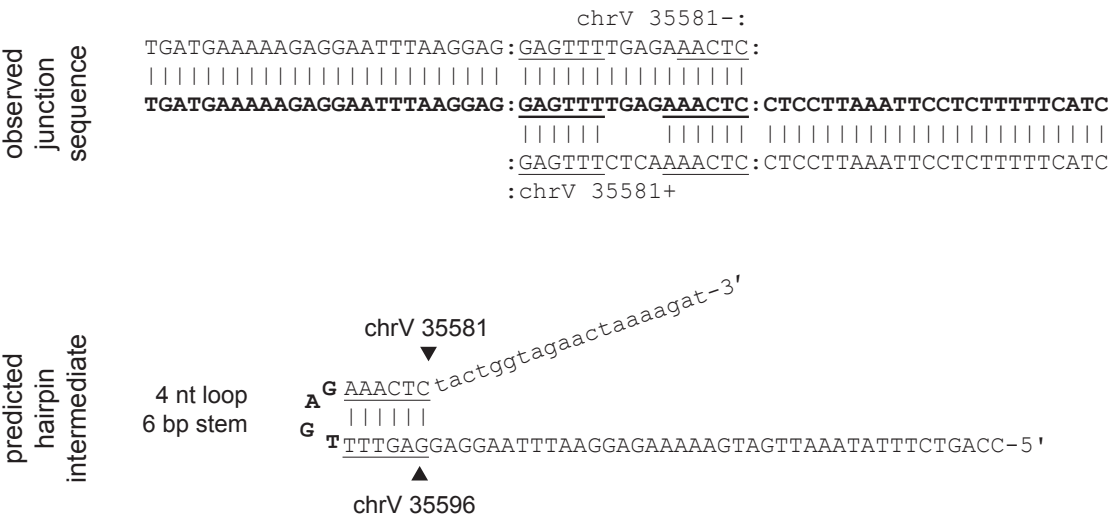

Figure 2 - figure supplement 1 (page 21 of 32)

AO. chrV L 35,664\_35,725 hairpin

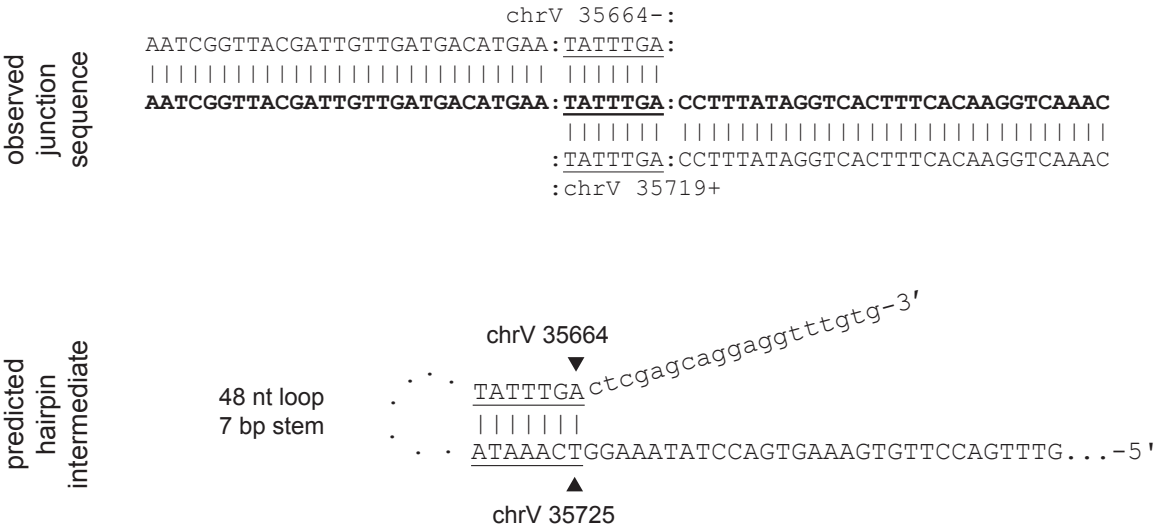

AP. chrV L 35,685\_35,698 hairpin

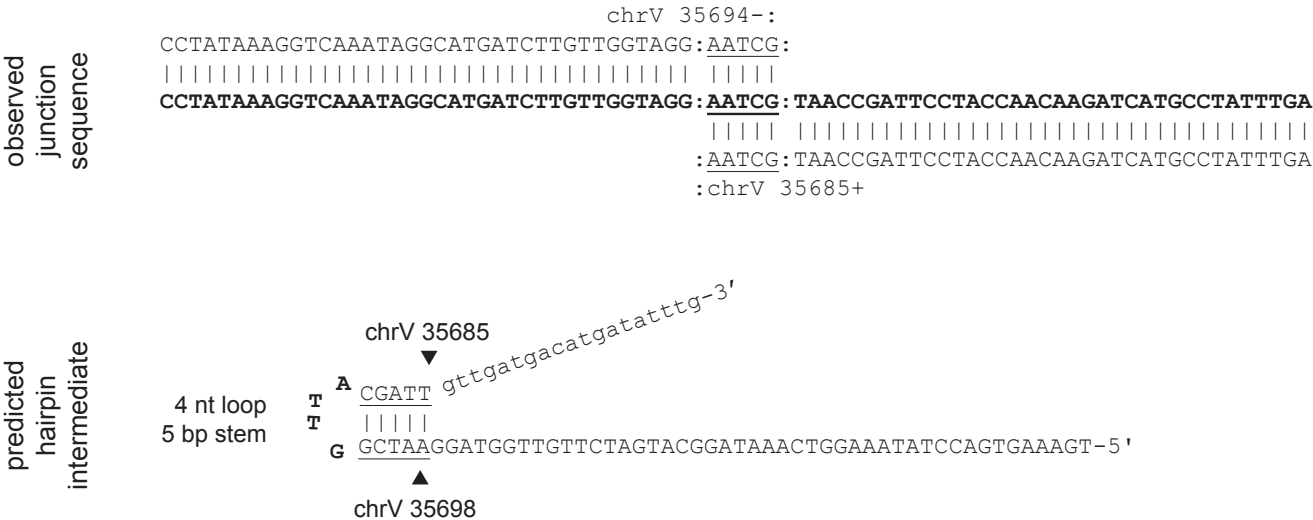

Figure 2 - figure supplement 1 (page 22 of 32)

**AQ. chrV L 35,694\_35,777 hairpin**

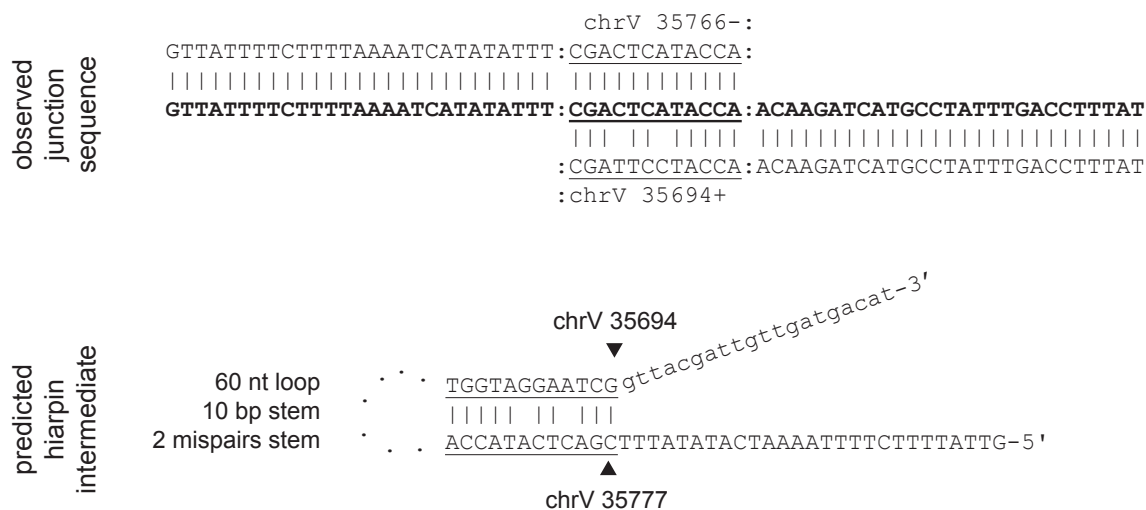

**AR. chrV L 35,721\_35,754 hairpin**

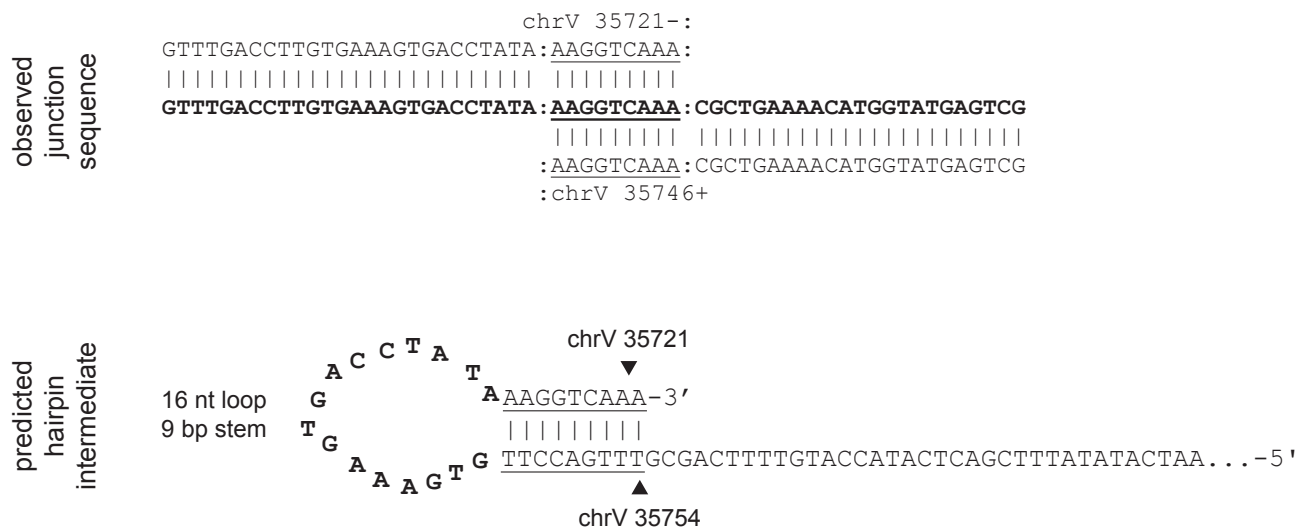

Figure 2 - figure supplement 1 (page 23 of 32)

AS. chrV L 35,723\_35,738 hairpin

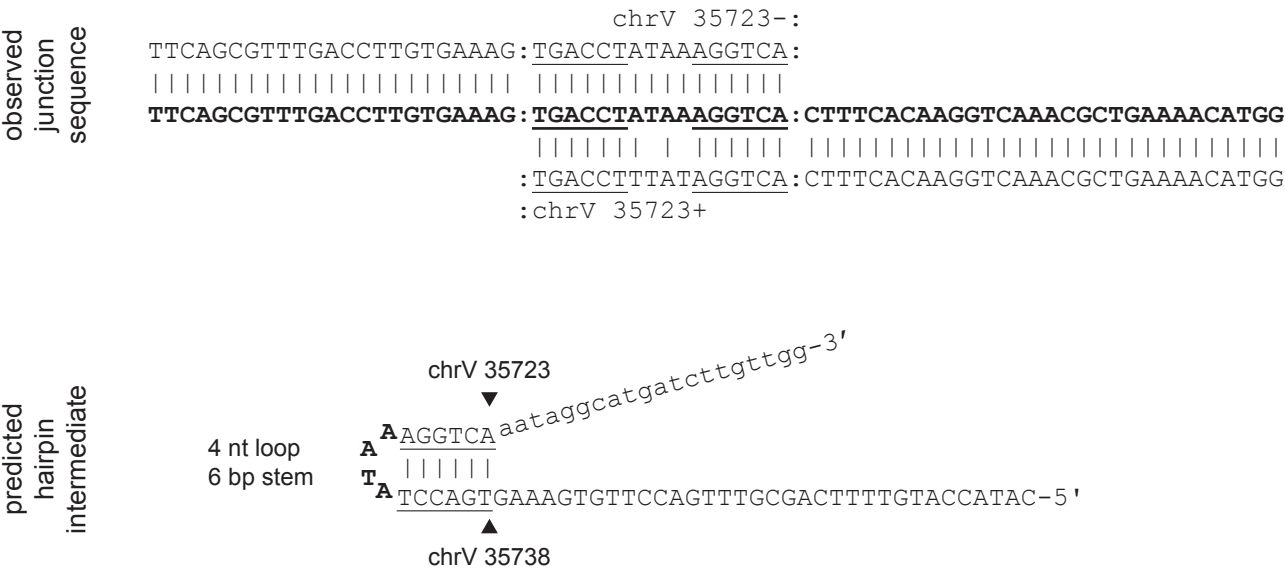

AT. chrV L 35,837\_35,872 hairpin

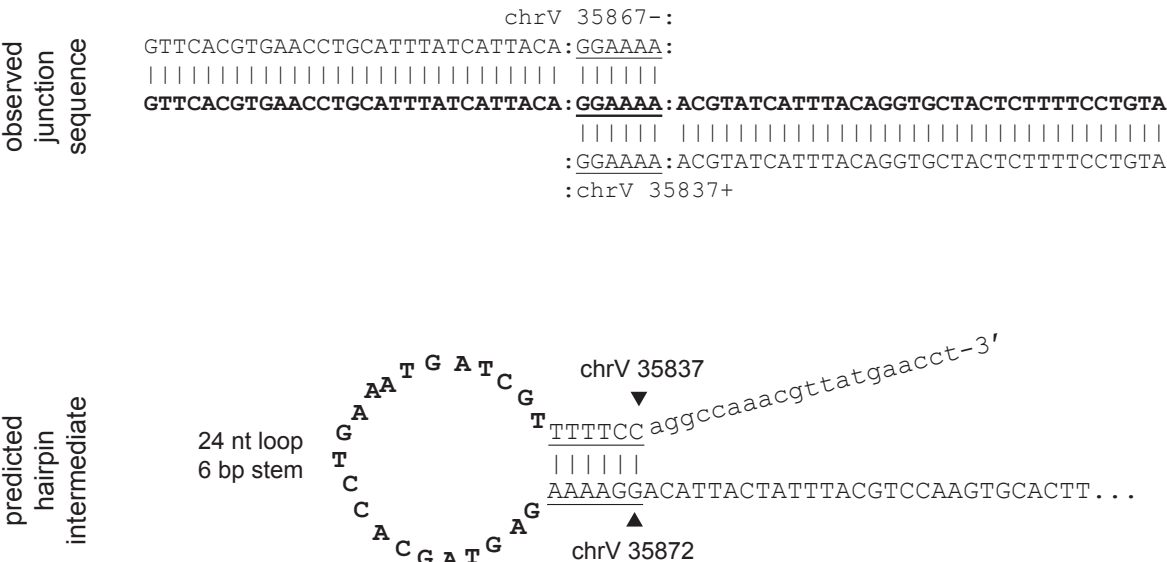

Figure 2 - figure supplement 1 (page 24 of 32)

AU. chrV L 35,889\_35,902 hairpin

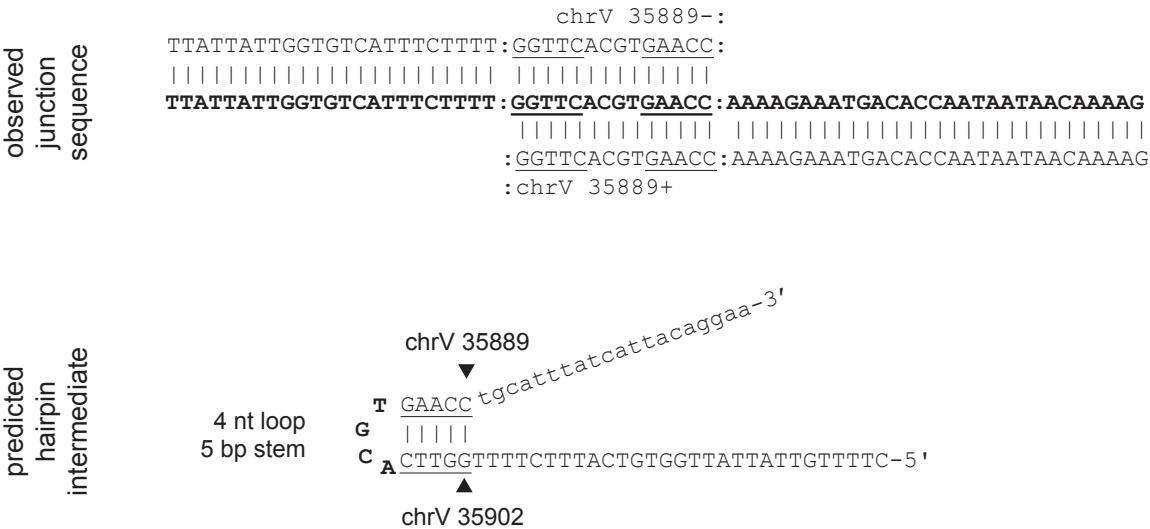

AV. chrV L 37,132\_37,150 hairpin

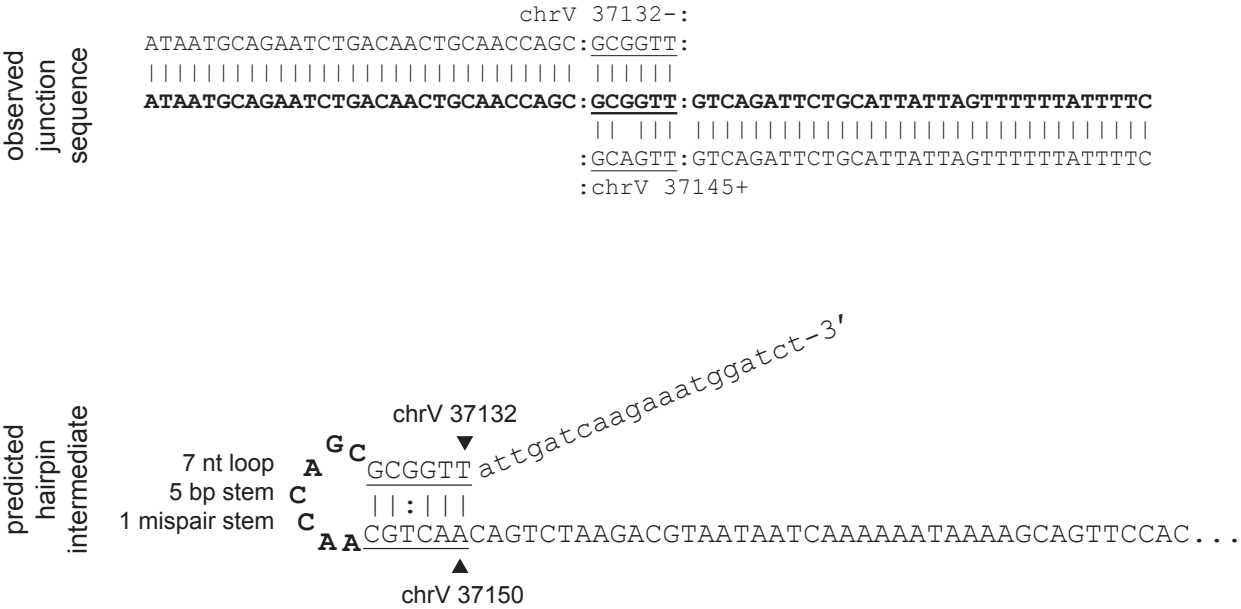



Figure 2 - figure supplement 1 (page 25 of 32)

AW. chrV L 38,072\_38,086 hairpin

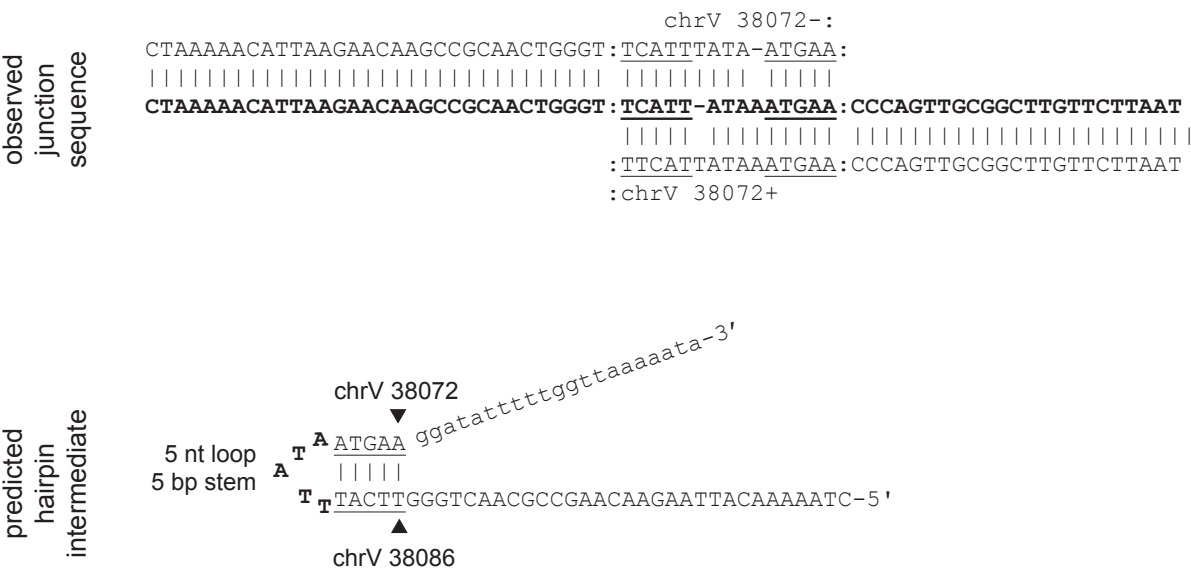

AX. chrV L 38,848\_38,871 hairpin

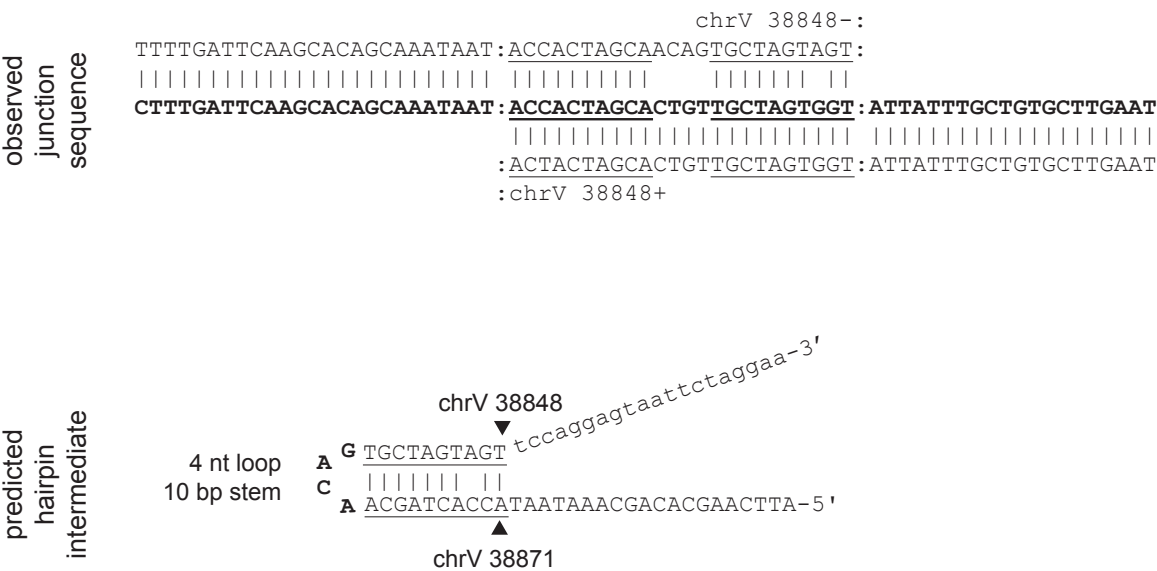

Figure 2 - figure supplement 1 (page 26 of 32)

AY. chrV L 39,661\_39,681 hairpin

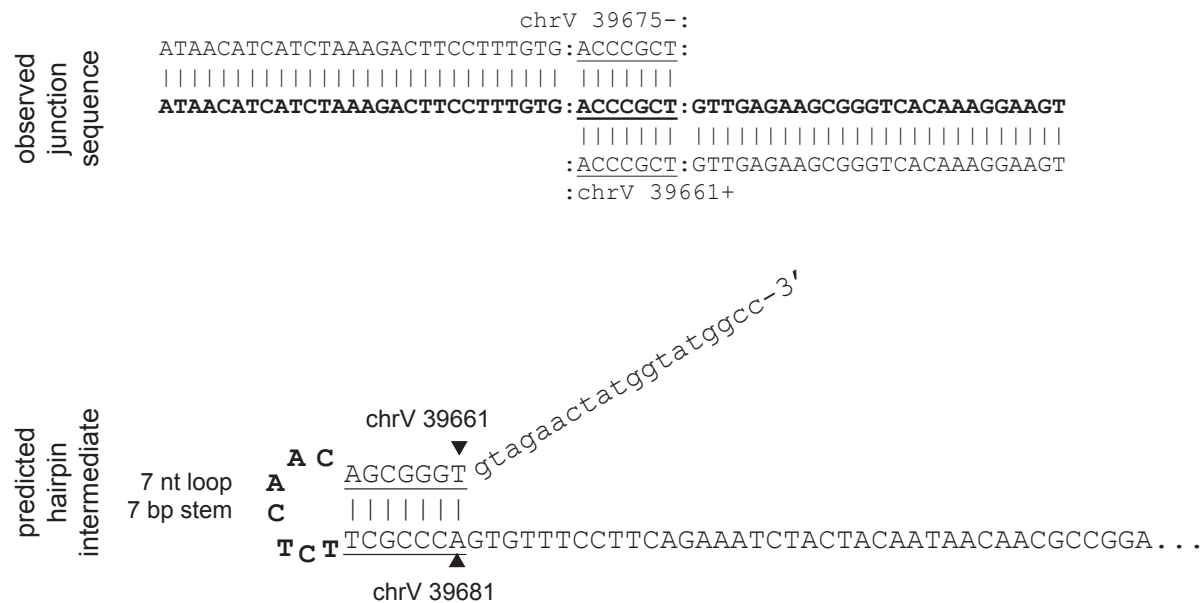

AZ. chrV L 40,281\_40,326 hairpin

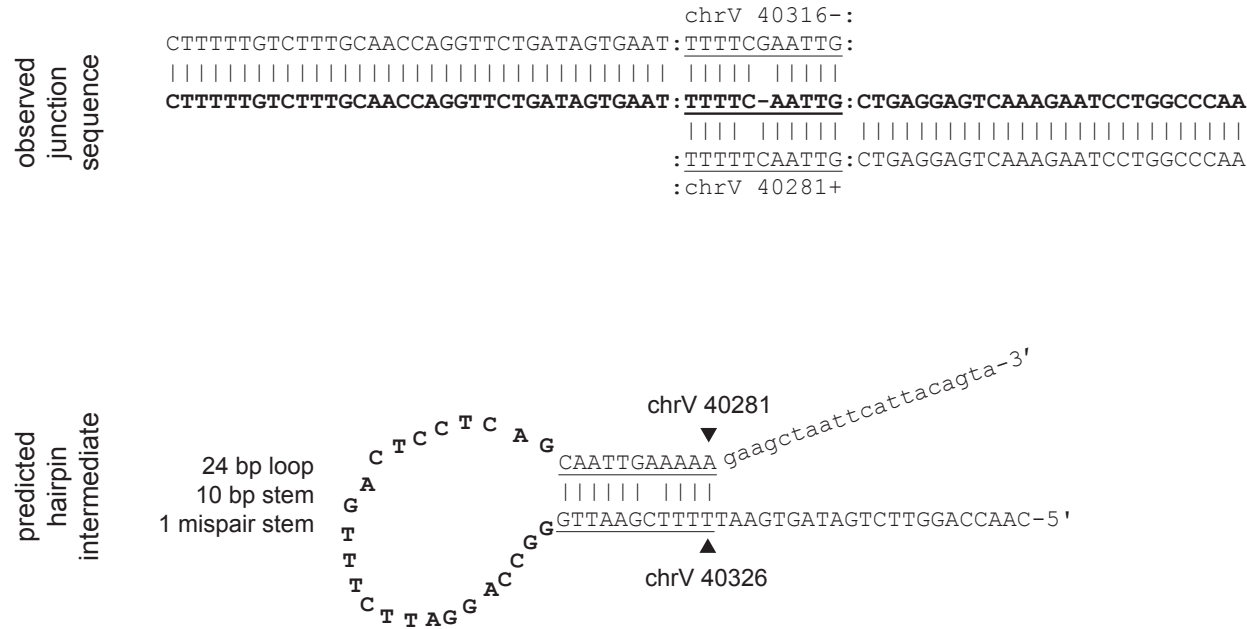

Figure 2 - figure supplement 1 (page 27 of 32)

BA. chrV L 40,877\_40,894 hairpin

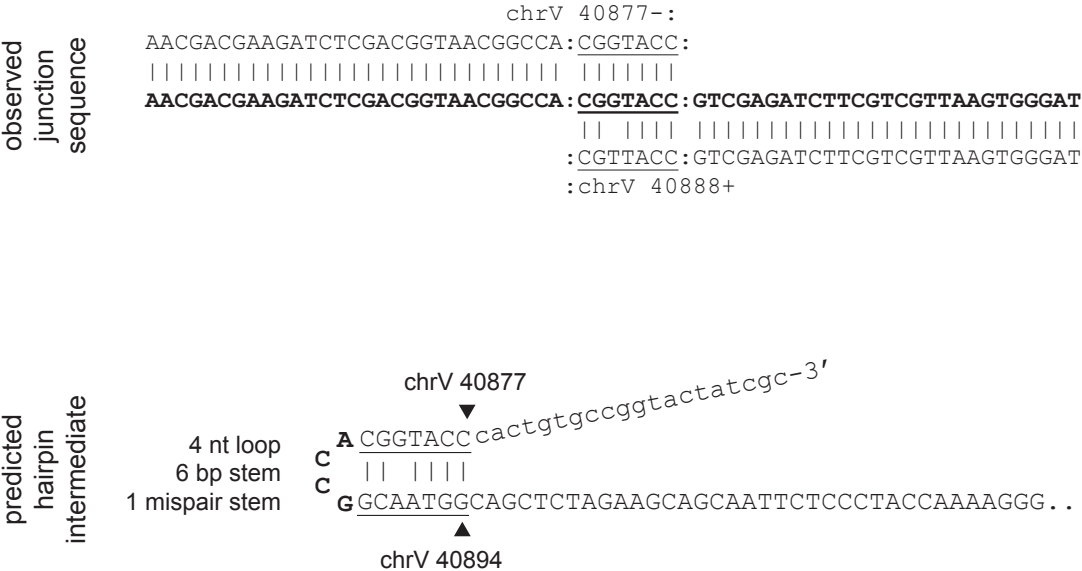

BB. chrV L 40,968\_40,983 hairpin

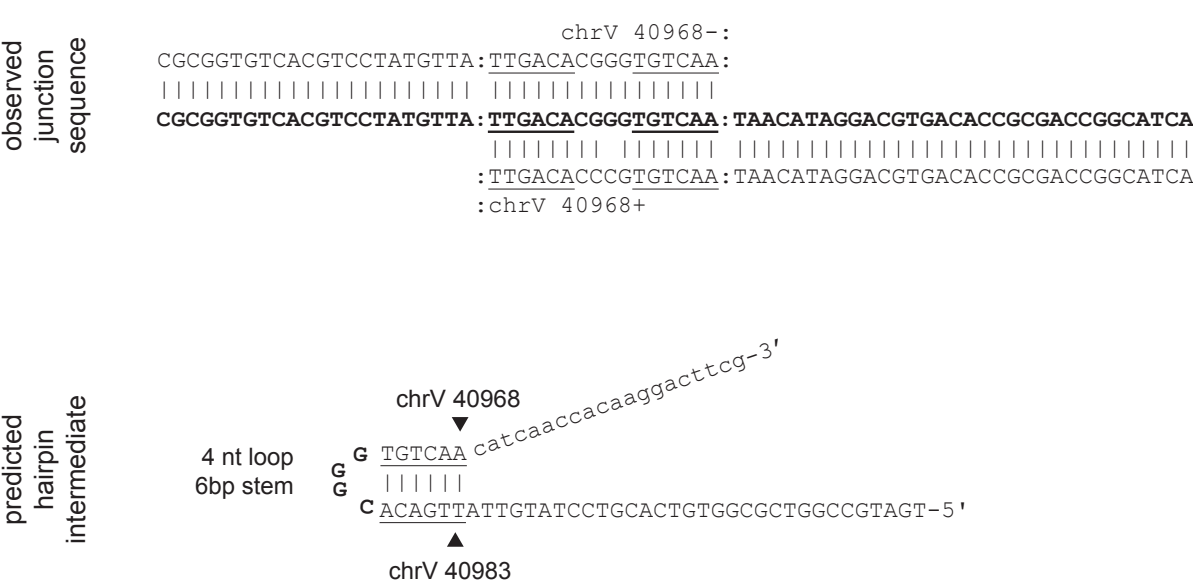

Figure 2 - figure supplement 1 (page 28 of 32)

BC. chrV L 40,994\_43,019 hairpin

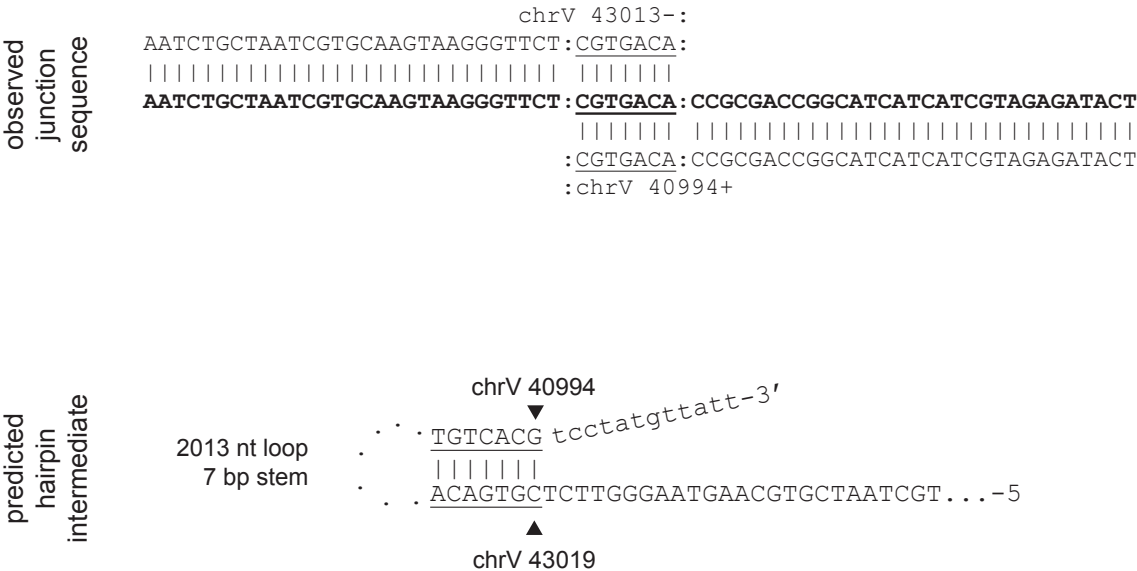

BD. chrV L 41,350\_41,363 hairpin

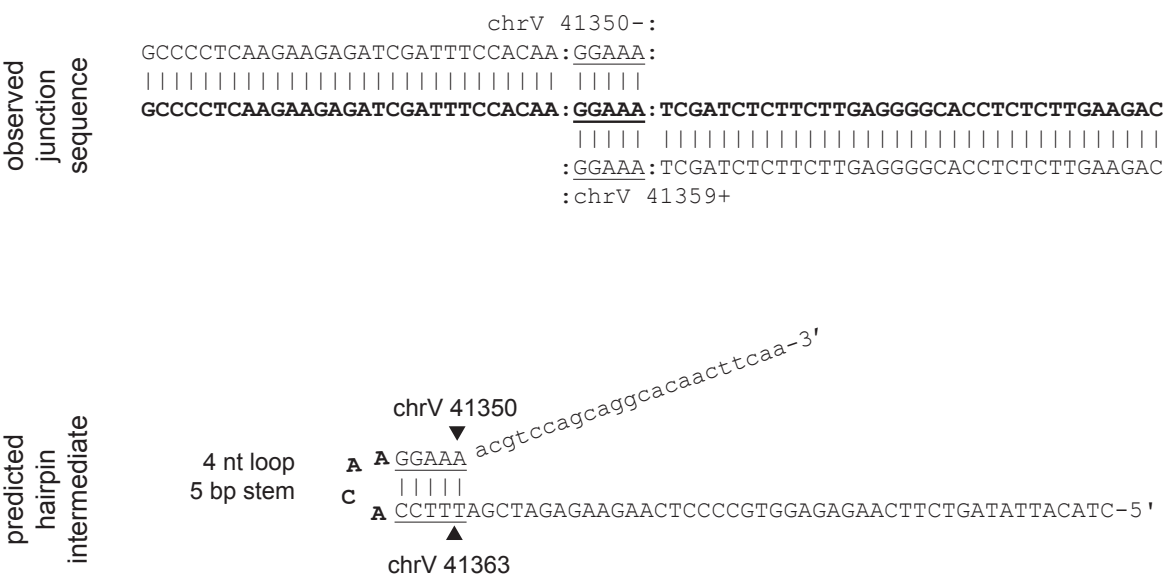

Figure 2 - figure supplement 1 (page 29 of 32)

BE. chrV L 41,622\_41,681 hairpin

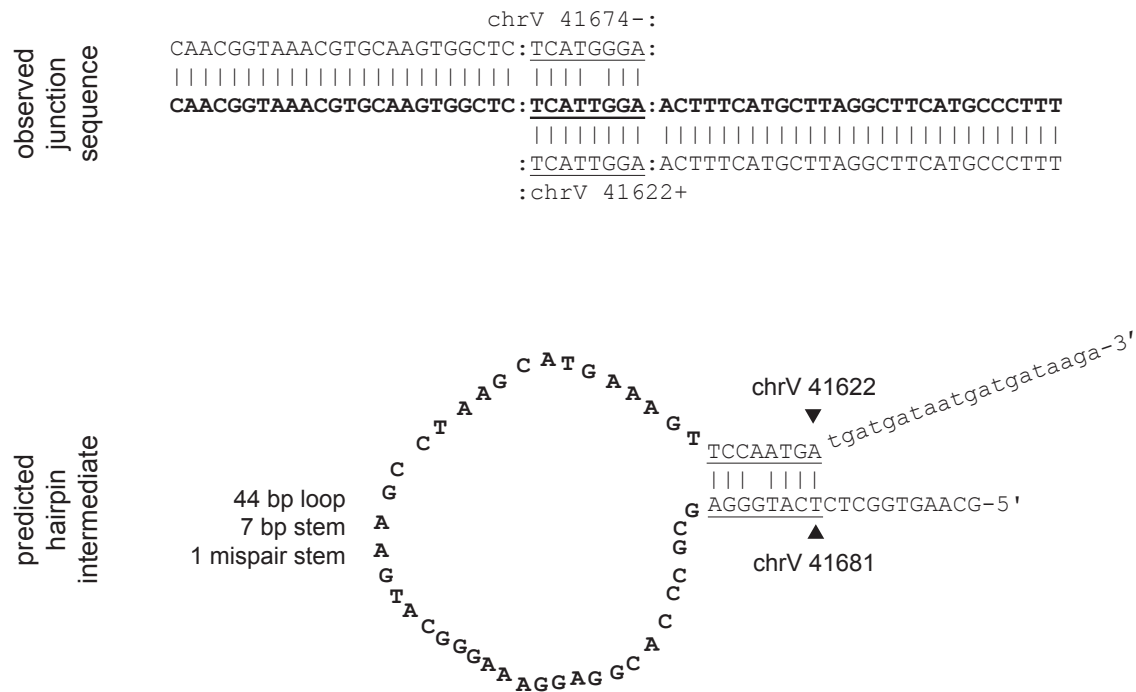

BF. chrV L 42,277\_42,290 hairpin

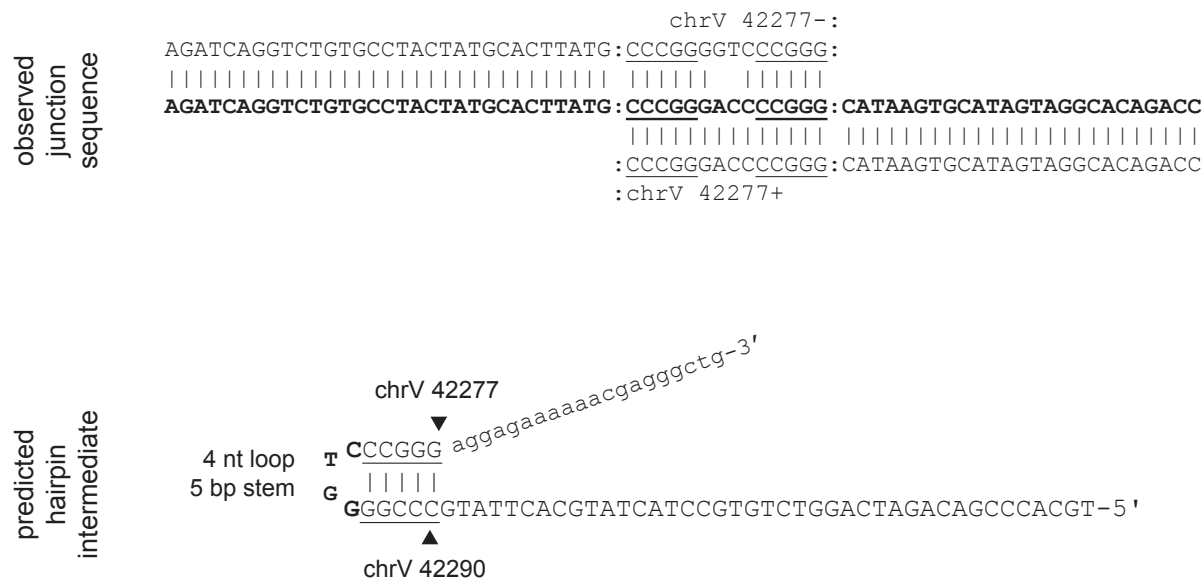

Figure 2 - figure supplement 1 (page 30 of 32)

**BG.** chrV L 42,855\_42,869 hairpin

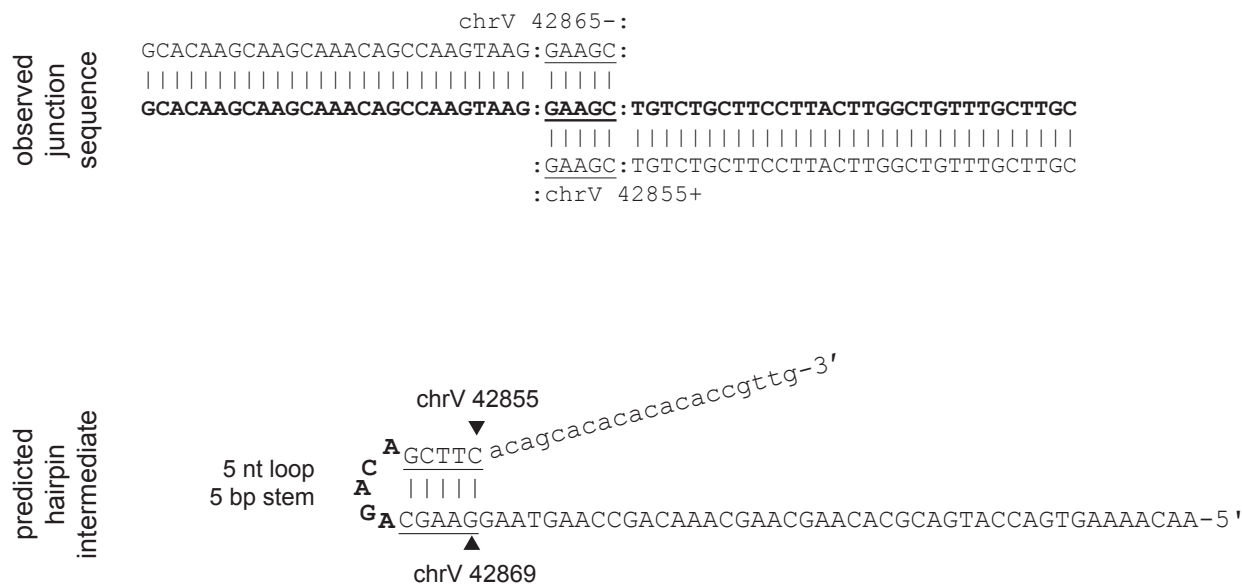

**BH.** chrV L 42,939\_42,955 hairpin

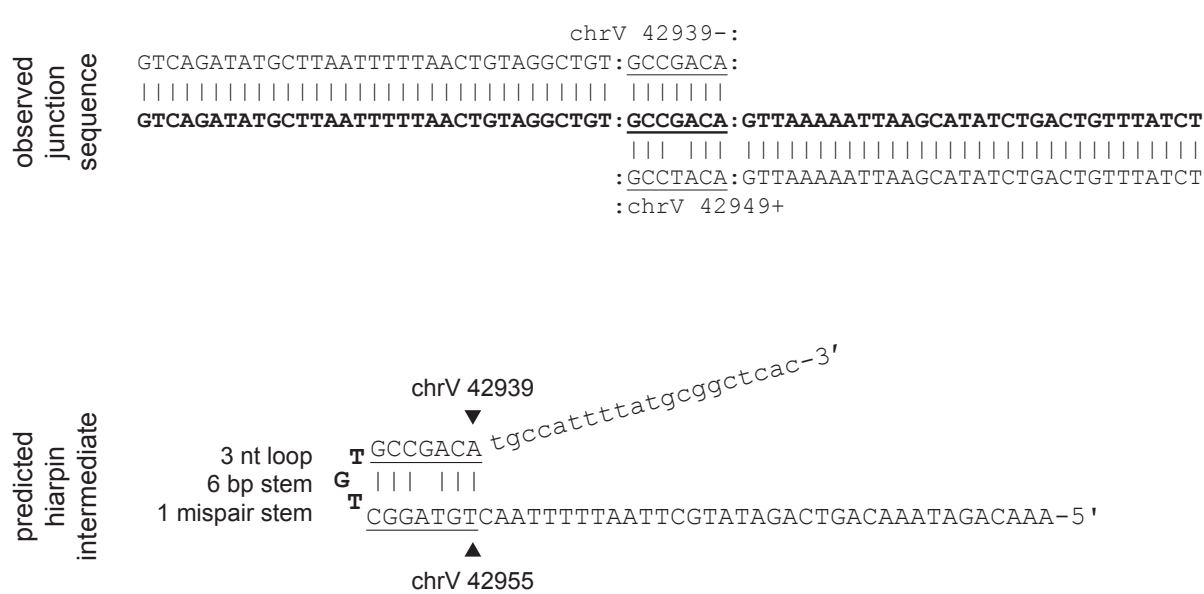

Figure 2 - figure supplement 1 (page 31 of 32)

BI. chrV L 51,934\_51,962 hairpin

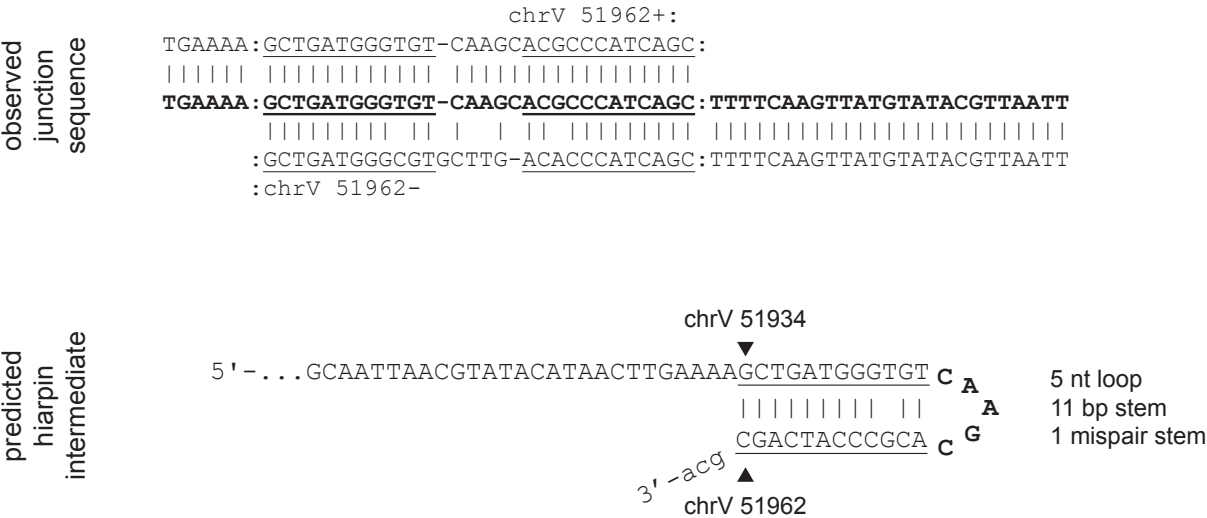

BJ. chrV L 72,380\_72,456 hairpin

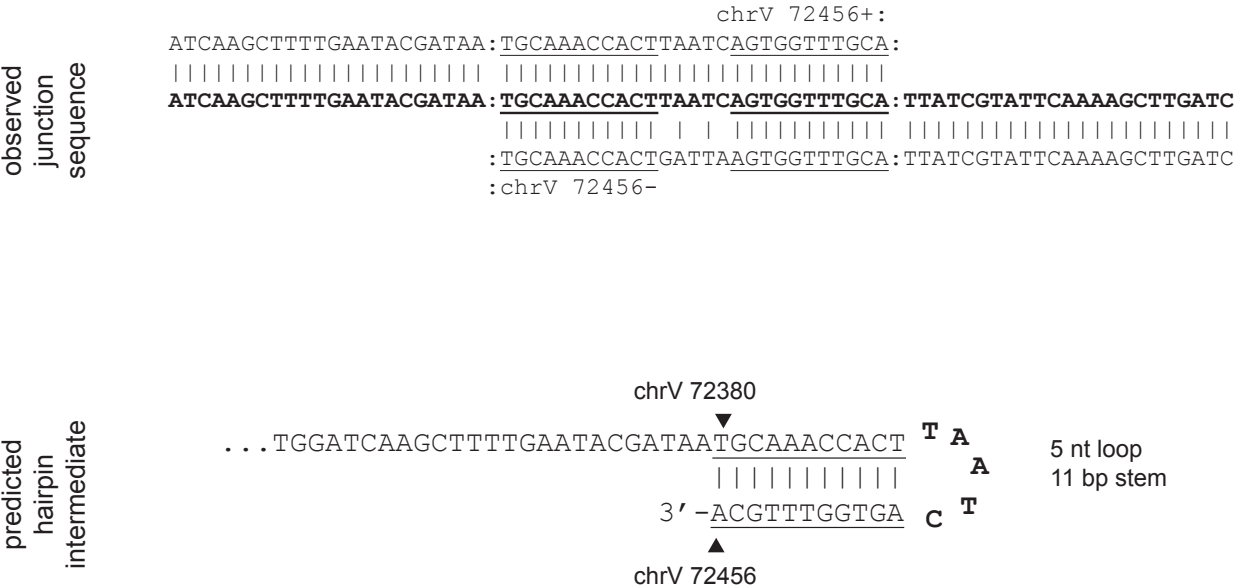

**Figure 2 - figure supplement 1 (page 32 of 32)**

**BK.** chrV L 84,266\_84,283 hairpin

```

observed      chrV 84272+:
junction
sequence     TGTTCATGGTATTTCAGATGGTTAAAAACATGGGA: AGATGCT:
|||||
TGTTCATGGTATTTCAGATGGTTAAAAACATGGGA: AGATGCT: TCTGAGCATCTTCCCATGTTTTTTAACCATCTGAA
|||||
:AGATGCT: TCTGAGCATCTTCCCATGTTTTTTAACCATCTGAA
:chrV 84283-

```

predicted  
hairpin  
intermediate

5' -TGTCATGGTATTCAGATGGTTAAAAACATGGGAAGATGCT C A 4 nt loop  
||||||| G 7 bp stem  
TCTACGA A

chrV 84266

chrV 84283

3' -aacaaaacgcacggtgactc
