# Supplementary material for: Mechanisms underlying genome instability mediated by formation of foldback inversions in Saccharomyces cerevisiae
Source: eLife. 2020 Aug 7;9:e58223. doi: 10.7554/eLife.58223 (PMC7467729; doi:10.7554/eLife.58223)
Supplement: Supplementary file 1. — These data are displayed in Figure 1, Figure 6, Figure 7, Figure 8, and Figure 9. [file elife-58223-supp1.xlsx]

## Sheet: RawData
Supplemental Table 1. Raw Data (uGCR assay)
				Rate Information							Product Distribution
Genotype		Strain		Total Rate	Rate 95% Lo	Rate 95% Hi		Fold vs WT	Rate Reference		Total isolates	De novo telomere	Inverted duplication (large loop >=15 nt hairpin)	Inverted duplication (small loop <= 15 nt hairpin)	Non-/Micro-homology translocation	Interstitial deletion		Total inverted duplication	Inverted duplication resolution by HR	Inverted duplication resolution by de novo	Inverted duplication resolution by translocation	Inverted duplication resolution complex	Inverted duplication resolution unknown		Product Distribution Reference
WT		RDKY6677		2.27e-09	1.3e-09	4.78e-09		1	Putnam 2009		27	22	1	1	1	2		2	2	0	0	0	0		Putnam 2014, Liang 2018*
mre11		RDKY6686		5.75e-07	2.82e-07	1.92e-06		250	Putnam 2009		13	5	1	3	3	1		4	4	0	0	0	0		Liang 2018
mre11-H125N		HZY2771		2.78e-07	1.8e-07	4.01e-07		12	Liang 2018		13	2	0	6	0	5		6	6	0	0	0	0		Liang 2018
exo1		RDKY6729		2e-09	8.58e-10	4.78e-09		0.88	Putnam 2009		11	10	0	0	1	0		na	na	na	na	na	na		this study
tel1		RDKY6761		4.99e-09	0	9.2e-09		2.2	Putnam 2009		31	13	9	1	0	8		10	10	0	0	0	0		Putnam 2014
rrm3		RDKY6735		9.46e-10	0	1.19e-08		0.42	Putnam 2009		14	8	4	0	1	1		4	4	0	0	0	0		this study
rad10		RDKY6734		8.49e-10	0	5.57e-09		0.37	Putnam 2009		12	10	1	0	0	1		1	1	0	0	0	0		this study
pol32		RDKY6703		3.41e-09	0	9.51e-09		1.5	Putnam 2009		11	10	0	0	0	1		na	na	na	na	na	na		this study
mus81		RDKY6731		1.26e-08	2.63e-09	3.31e-08		5.6	Putnam 2009		12	11	0	0	1	0		na	na	na	na	na	na		this study
slx1 (<)		RDKY6738		1.12e-09	6.82e-10	1.42e-09		0.49	Putnam 2009		12	6	0	0	0	6		na	na	na	na	na	na		this study
yen1		RDKY9506		2.45e-09	0	5.68e-09		1.1	this study		11	6	4	0	1	0		4	4	0	0	0	0		this study
rad52		RDKY6691		1.67e-08	9.89e-09	2.74e-08		7.4	Putnam 2009		12	11	0	0	1	0		na	na	na	na	na	na		this study
yku80 (<)		RDKY8006		6.88e-10	6.16e-10	7.91e-10		0.3	Putnam 2014		12	1	1	4	4	2		5	5	0	0	0	0		this study
sgs1		RDKY6687		1.69e-08	3.1e-09	3.02e-08		7.4	Putnam 2009		11	7	1	0	2	1		1	1	0	0	0	0		this study
sgs1 yku80		RDKY9445		5.59e-09	1.54e-09	3.27e-08		2.5	this study		12	5	1	4	2	0		5	5	0	0	0	0		this study
exo1 sgs1		RDKY8032		5.7e-06	2.92e-06	1.05e-05		2500	this study		12	12	0	0	0	0		na	na	na	na	na	na		this study
exo1 yku80		RDKY9771		1.17e-09	9.3e-10	2.53e-09		0.52	this study		12	6	3	2	0	1		5	4	1	0	0	0		this study
pif1		RDKY6894		3.73e-07	2.03e-07	5.84e-07		160	Putnam 2010		12	12	0	0	0	0		na	na	na	na	na	na		this study
pif1 yku80		RDKY9773		2.11e-07	1.52e-07	3.48e-07		93	this study		12	12	0	0	0	0		na	na	na	na	na	na		this study
sae2-hotspotdel		RDKY9734		3.82e-08	1.41e-08	4.35e-08		17	this study		12	0	0	9	1	2		9	7	0	0	2	0		this study
sae2-S267A		RDKY9472		3.16e-08	2.51e-08	4.99e-08		14	this study		12	0	0	12	0	0		12	11	0	0	1	0		this study
sae2-MT9		RDKY9496		5.72e-08	5.28e-08	6.52e-08		25	this study		12	0	0	11	1	0		11	11	0	0	0	0		this study
sae2		RDKY6737		4.23e-08	2.92e-08	5.32e-08		19	Putnam 2009		20	1	0	19	0	0		19	18	0	1	0	0		this study
sae2 exo1		RDKY8020		8.13e-09	2.78e-09	2.28e-08		3.6	Putnam 2014		18	2	0	16	0	0		16	16	0	0	0	0		this study
sae2 tel1		RDKY8018		7.14e-08	5.03e-08	9.7e-08		31	Putnam 2014		11	0	0	11	0	0		11	9	0	1	1	0		this study
sae2 rrm3		RDKY9125		1.04e-07	8.57e-08	1.45e-07		46	this study		12	2	0	7	3	0		7	7	0	0	0	0		this study
sae2 rad10		RDKY9123		6.59e-08	5.15e-08	7.97e-08		29	this study		12	0	2	9	1	0		11	9	0	0	2	0		this study
sae2 pol32		RDKY9390		1.08e-07	7.55e-08	1.34e-07		48	this study		15	2	0	10	2	1		10	9	1	0	0	0		this study
sae2 mus81		RDKY9392		5.99e-08	5.72e-08	6.52e-08		26	this study		16	5	0	8	3	0		8	8	0	0	0	0		this study
sae2 slx1		RDKY9502		1.24e-07	1.13e-07	1.45e-07		55	this study		12	0	0	12	0	0		12	11	0	1	0	0		this study
sae2 yen1		RDKY9500		1.23e-07	9.92e-08	1.84e-07		54	this study		12	0	1	11	0	0		12	11	0	0	1	0		this study
sae2 rad52		RDKY9504		3.42e-07	2.75e-07	3.63e-07		150	this study		12	2	0	8	2	0		8	1	2	5	0	0		this study
sae2 yku80		RDKY9443		1.18e-07	6.22e-08	1.47e-07		52	this study		12	1	0	11	0	0		11	10	0	0	1	0		this study
sae2 sgs1		na		na	na	na		na	na		na	na	na	na	na	na		na	na	na	na	na	na		na
sae2 sgs1 yku80		RDKY9775		4.17e-08	2.42e-08	5.17e-08		18	this study		10	0	1	9	0	0		11	11	0	0	0	0		this study
sae2 exo1 sgs1		na		na	na	na		na	na		na	na	na	na	na	na		na	na	na	na	na	na		na
sae2 exo1 yku80		RDKY9777		2.65e-08	1.26e-08	3.35e-08		12	this study		12	0	1	11	0	0		12	12	0	0	0	0		this study
sae2 pif1		RDKY9447		4.22e-06	3.59e-06	7.35e-06		1900	this study		12	11	0	1	0	0		1	0	1	0	0	0		this study
sae2 pif1 yku80		RDKY9779		2.11e-06	1.64e-06	3.08e-06		930	this study		12	7	0	5	0	0		5	0	4	1	0	0		this study
*For wild-type, the assignment of GCR isolates as de novo telomere additions is based on the lack of chrV L amplification from MLPA and in 10 cases migration patterns on CHEF gels; non de novo telomere additions assigned using WGS and/or array CGH.

## Sheet: CalcRates
Calculated Rates (uGCR rates)
Genotype		Total Rate	Total Rate 95% Low	Total Rate 95% High		Number of Isolates	Number of Foldback Inversion Isolates	Adjusted Number of Foldback Inversions*		Upper Limit**	Proportion of Foldback Inversions	Proportion 95% Low***'	Proportion 95% High***	Foldback Inversion Rate	(r-rlo/r)^2 for 95% Low	(p-plo/p)^2 for 95% Low	(r-rhi/r)^2 for 95% High	(p-phi/p)^2 for 95% High	Foldback Inversion 95% Low	Foldback Inversion 95% High		Upper Limit**	Fold Over WT Foldback Inversion Rate	Fold Over WT Foldback Inversion 95% Low	Fold Over WT Foldback Inversion 95% High	Fold Over WT Foldback Inversion Rate With 2 Significant Digits	Fold Over WT Foldback Inversion 95% Low With 2 Significant Digits	Fold Over WT Foldback Inversion 95% High With 2 Significant Digits
WT		2.27e-09	1.3e-09	4.78e-09		27	2	2			0.074074	0	0.185185	1.68148e-10	0.182596	1	1.22263	2.25	0	4.81492e-10			1	0	2.8635	1.0	0.0	2.8
mre11		5.75e-07	2.82e-07	1.92e-06		13	4	4			0.307692	0.076923	0.538462	1.76923e-07	0.259657	0.5625	5.47153	0.562505	1.65019e-08	6.11521e-07			1052.19	98.1389	3636.8	1100	98	3600
mre11-H125N		2.78e-07	1.8e-07	4.01e-07		13	6	6			0.461538	0.230769	0.692308	1.28308e-07	0.124269	0.25	0.195759	0.250002	4.98122e-08	2.13973e-07			763.063	296.24	1272.52	760	300	1300
exo1		2e-09	8.58e-10	4.78e-09		11	0	1		(<)	0.090909	0	0.272727	1.81818e-10	0.326041	1	1.9321	4	0	6.24652e-10		(<)	1.0813	0	3.7149	1.0	0.0	3.7
tel1		4.99e-09	0	9.2e-09		31	10	10			0.322581	0.16129	0.483871	1.60968e-09	1	0.250002	0.711808	0.249998	0	3.18832e-09			9.57299	0	18.9614	10.0	0.0	19
rrm3		9.46e-10	0	1.19e-08		14	4	4			0.285714	0.071429	0.5	2.70285e-10	1	0.562497	134.08	0.562503	0	3.40655e-09			1.60743	0	20.2593	1.6	0.0	20
rad10		8.49e-10	0	5.57e-09		12	1	1			0.083333	0	0.25	7.07497e-11	1	1	30.9209	4.00005	0	4.88838e-10			0.420759	0	2.90719	0.4	0.0	2.9
pol32		3.41e-09	0	9.51e-09		11	0	1		(<)	0.090909	0	0.272727	3.1e-10	1	1	3.20001	4	0	1.14182e-09		(<)	1.84361	0	6.79055	1.8	0.0	6.8
mus81		1.26e-08	2.63e-09	3.31e-08		12	0	1		(<)	0.083333	0	0.25	1.05e-09	0.626108	1	2.64708	4.00005	0	3.7571e-09		(<)	6.24447	0	22.344	6.2	0.0	22
slx1 (<)		1.12e-09	6.82e-10	1.42e-09		12	0	1		(<)	0.083333	0	0.25	9.3333e-11	0.152937	1	0.0717474	4.00005	0	2.81667e-10		(<)	0.555064	0	1.67511	0.56	0.0	1.7
yen1		2.45e-09	0	5.68e-09		11	4	4			0.363636	0.090909	0.636364	8.90908e-10	1	0.5625	1.73809	0.562504	0	2.24221e-09			5.29836	0	13.3348	5.3	0.0	13
rad52		1.67e-08	9.89e-09	2.74e-08		12	0	1		(<)	0.083333	0	0.25	1.39166e-09	0.166288	1	0.41052	4.00005	0	4.31434e-09		(<)	8.27641	0	25.658	8.3	0.0	26
yku80 (<)		6.88e-10	6.16e-10	7.91e-10		12	5	5			0.416667	0.166667	0.666667	2.86667e-10	0.0109519	0.359999	0.0224129	0.359999	1.1207e-10	4.6394e-10			1.70485	0.666498	2.75912	1.7	0.7	2.8
sgs1		1.69e-08	3.1e-09	3.02e-08		11	1	1			0.090909	0	0.272727	1.53636e-09	0.666783	1	0.619341	4	0	4.83841e-09			9.13696	0	28.7747	9.1	0.0	29
sgs1 yku80		5.59e-09	1.54e-09	3.27e-08		12	5	5			0.416667	0.166667	0.666667	2.32917e-09	0.524912	0.359999	23.5199	0.359999	1.38126e-10	1.37111e-08			13.8519	0.821455	81.542	14	0.8	82
exo1 sgs1		5.7e-06	2.92e-06	1.05e-05		12	0	1		(<)	0.083333	0	0.25	4.74998e-07	0.23787	1	0.709141	4.00005	0	1.50578e-06		(<)	2824.88	0	8955.06	2800	0.0	9000
exo1 yku80		1.17e-09	9.3e-10	2.53e-09		12	5	5			0.416667	0.166667	0.666667	4.875e-10	0.0420776	0.359999	1.35116	0.359999	1.78379e-10	1.12521e-09			2.89923	1.06084	6.69176	2.9	1.1	6.7
pif1		3.73e-07	2.03e-07	5.84e-07		12	0	1		(<)	0.083333	0	0.25	3.10832e-08	0.207721	1	0.319998	4.00005	0	9.56888e-08		(<)	184.856	0	569.075	180	0.0	570
pif1 yku80		2.11e-07	1.52e-07	3.48e-07		12	0	1		(<)	0.083333	0	0.25	1.75833e-08	0.0781878	1	0.421576	4.00005	0	5.45567e-08		(<)	104.57	0	324.457	100	0.0	320
sae2-hotspotdel		3.82e-08	1.41e-08	4.35e-08		12	9	9			0.75	0.5	1	2.865e-08	0.398022	0.111111	0.0192497	0.111111	8.2072e-09	3.89942e-08			170.386	48.8094	231.904	170	49	230
sae2-S267A		3.16e-08	2.51e-08	4.99e-08		12	12	12			1	0.769231	1	3.16e-08	0.0423109	0.0532543	0.335373	0	2.18313e-08	4.99e-08			187.93	129.834	296.762	190	150	300
sae2-MT9		5.72e-08	5.28e-08	6.52e-08		12	11	11			0.916667	0.75	1	5.24334e-08	0.00591716	0.033058	0.0195609	0.00826439	4.20819e-08	6.11797e-08			311.829	250.267	363.844	310	250	360
sae2		4.23e-08	2.92e-08	5.32e-08		20	19	19			0.95	0.85	1	4.0185e-08	0.0959096	0.0110803	0.0664006	0.00277008	2.70408e-08	5.07538e-08			238.986	160.815	301.84	240	160	300
sae2 exo1		8.13e-09	2.78e-09	2.28e-08		18	16	16			0.888889	0.722222	1	7.22667e-09	0.433038	0.0351564	3.25596	0.015625	2.28184e-09	2.02979e-08			42.978	13.5704	120.715	43	14	120
sae2 tel1		7.14e-08	5.03e-08	9.7e-08		11	11	11			1	0.75	1	7.14e-08	0.087331	0.0625	0.128553	0	4.37625e-08	9.7e-08			424.626	260.262	576.873	420	260	580
sae2 rrm3		1.04e-07	8.57e-08	1.45e-07		12	7	7			0.583333	0.33333	0.83333	6.06666e-08	0.0309625	0.183678	0.155418	0.183669	3.25602e-08	9.59935e-08			360.793	193.64	570.887	360	190	570
sae2 rad10		6.59e-08	5.15e-08	7.97e-08		12	11	11			0.916667	0.75	1	6.04084e-08	0.0477479	0.033058	0.0438518	0.00826439	4.32365e-08	7.4199e-08			359.257	257.133	441.272	360	260	440
sae2 pol32		1.08e-07	7.55e-08	1.34e-07		15	10	10			0.666667	0.4	0.866667	7.2e-08	0.0905564	0.16	0.0579561	0.0899999	3.596e-08	9.96949e-08			428.194	213.859	592.9	430	210	600
sae2 mus81		5.99e-08	5.72e-08	6.52e-08		16	8	8			0.5	0.25	0.75	2.995e-08	0.00203177	0.25	0.00782885	0.25	1.49143e-08	4.51577e-08			178.117	88.6973	268.559	180	89	270
sae2 slx1		1.24e-07	1.13e-07	1.45e-07		12	12	12			1	0.769231	1	1.24e-07	0.00786941	0.0532543	0.0286811	0	9.33432e-08	1.45e-07			737.446	555.125	862.336	740	560	860
sae2 yen1		1.23e-07	9.92e-08	1.84e-07		12	12	12			1	0.769231	1	1.23e-07	0.0374407	0.0532543	0.245951	0	8.59578e-08	1.84e-07			731.499	511.203	1094.27	730	510	1100
sae2 rad52		3.42e-07	2.75e-07	3.63e-07		12	8	8			0.666667	0.416667	0.916667	2.28e-07	0.0383793	0.140625	0.00377039	0.140625	1.31536e-07	3.14639e-07			1355.95	782.262	1871.2	1400	780	1900
sae2 yku80		1.18e-07	6.22e-08	1.47e-07		12	11	11			0.916667	0.75	1	1.08167e-07	0.223617	0.033058	0.0603993	0.00826439	5.33661e-08	1.3651e-07			643.283	317.376	811.847	640	320	810
sae2 sgs1		na	na	na		na	na	na			na	na	na	na					na	na			na	na	na	na	na	na
sae2 sgs1 yku80		4.17e-08	2.42e-08	5.17e-08		10	10	10			1	0.727273	1	4.17e-08	0.176118	0.07438	0.057508	0	2.08292e-08	5.17e-08			247.996	123.874	307.467	250	120	310
sae2 exo1 sgs1		na	na	na		na	na	na			na	na	na	na					na	na			na	na	na	na	na	na
sae2 exo1 yku80		2.65e-08	1.26e-08	3.35e-08		12	12	12			1	0.769231	1	2.65e-08	0.27513	0.0532543	0.0697757	0	1.13142e-08	3.35e-08			157.599	67.2873	199.229	160	67	200
sae2 pif1		4.22e-06	3.59e-06	7.35e-06		12	1	1			0.083333	0	0.25	3.51665e-07	0.0222872	1	0.550128	4.00005	0	1.10181e-06			2091.4	0	6552.61	2100	0.0	6600
sae2 pif1 yku80		2.11e-06	1.64e-06	3.08e-06		12	5	5			0.416667	0.166667	0.666667	8.79167e-07	0.049617	0.359999	0.211338	0.359999	3.16489e-07	1.5437e-06			5228.53	1882.2	9180.62	5200	1900	9200
*Adjusted Inverted Duplication Number is the number of observed inverted duplications (if that number is greater than zero) or 1, so that an upper limit to the inverted duplication GCR rate can be calculated.
**If the calculated rate is an upper limit on the inverted duplication rate (e.g. no inverted duplication GCRs were observed), the column will contain "(<)"
***Calculated from the 95% confidence interval of proportions from bootstrap simulations with a pseudo-count of 1 added to the number of foldback inversions or non-foldback inversions if either number is zero.
